# Supplementary material for: Psychosocial impact on frontline health and social care professionals in the UK during the COVID-19 pandemic: a qualitative interview study
Source: PubMed Central journal article supplement (PMC7871227; doi:10.1136/bmjopen-2020-047353), 2021-02-08
Supplement: bmjopen-2020-047353.draft_revisions.pdf [file bmjopen-2020-047353.draft_revisions.pdf]

# BMJ Open

BMJ Open is committed to open peer review. As part of this commitment we make the peer review history of every article we publish publicly available.

When an article is published we post the peer reviewers' comments and the authors' responses online. We also post the versions of the paper that were used during peer review. These are the versions that the peer review comments apply to.

The versions of the paper that follow are the versions that were submitted during the peer review process. They are not the versions of record or the final published versions. They should not be cited or distributed as the published version of this manuscript.

BMJ Open is an open access journal and the full, final, typeset and author-corrected version of record of the manuscript is available on our site with no access controls, subscription charges or pay-per-view fees (<http://bmjopen.bmj.com>).

If you have any questions on BMJ Open's open peer review process please email [info.bmjopen@bmj.com](mailto:info.bmjopen@bmj.com)

# BMJ Open

## The psychosocial impact on frontline health and social care professionals in the UK during the COVID-19 pandemic: a qualitative interview study.

|                               |                                                                                                                                                                                                                                                                                                                                                                                                                                                                                                                                                                                             |
|-------------------------------|---------------------------------------------------------------------------------------------------------------------------------------------------------------------------------------------------------------------------------------------------------------------------------------------------------------------------------------------------------------------------------------------------------------------------------------------------------------------------------------------------------------------------------------------------------------------------------------------|
| Journal:                      | <i>BMJ Open</i>                                                                                                                                                                                                                                                                                                                                                                                                                                                                                                                                                                             |
| Manuscript ID                 | bmjopen-2020-047353                                                                                                                                                                                                                                                                                                                                                                                                                                                                                                                                                                         |
| Article Type:                 | Original research                                                                                                                                                                                                                                                                                                                                                                                                                                                                                                                                                                           |
| Date Submitted by the Author: | 30-Nov-2020                                                                                                                                                                                                                                                                                                                                                                                                                                                                                                                                                                                 |
| Complete List of Authors:     | Aughterson, Henry; University College London Research Department of Epidemiology and Public Health, Behavioural science and health<br>McKinlay, Alison; University College London Research Department of Epidemiology and Public Health, Department of Behavioural Science and Health<br>Fancourt, Daisy; University College London Research Department of Epidemiology and Public Health, Department of Behavioural Science and Health<br>Burton, Alexandra; University College London Research Department of Epidemiology and Public Health, Department of Behavioural Science and Health |
| Keywords:                     | MENTAL HEALTH, COVID-19, QUALITATIVE RESEARCH, Health policy < HEALTH SERVICES ADMINISTRATION & MANAGEMENT, MEDICAL EDUCATION & TRAINING, PUBLIC HEALTH                                                                                                                                                                                                                                                                                                                                                                                                                                     |
|                               |                                                                                                                                                                                                                                                                                                                                                                                                                                                                                                                                                                                             |

SCHOLARONE™  
Manuscripts

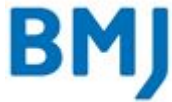

I, the Submitting Author has the right to grant and does grant on behalf of all authors of the Work (as defined in the below author licence), an exclusive licence and/or a non-exclusive licence for contributions from authors who are: i) UK Crown employees; ii) where BMJ has agreed a CC-BY licence shall apply, and/or iii) in accordance with the terms applicable for US Federal Government officers or employees acting as part of their official duties; on a worldwide, perpetual, irrevocable, royalty-free basis to BMJ Publishing Group Ltd ("BMJ") its licensees and where the relevant Journal is co-owned by BMJ to the co-owners of the Journal, to publish the Work in this journal and any other BMJ products and to exploit all rights, as set out in our [licence](#).

The Submitting Author accepts and understands that any supply made under these terms is made by BMJ to the Submitting Author unless you are acting as an employee on behalf of your employer or a postgraduate student of an affiliated institution which is paying any applicable article publishing charge ("APC") for Open Access articles. Where the Submitting Author wishes to make the Work available on an Open Access basis (and intends to pay the relevant APC), the terms of reuse of such Open Access shall be governed by a Creative Commons licence – details of these licences and which [Creative Commons](#) licence will apply to this Work are set out in our licence referred to above.

Other than as permitted in any relevant BMJ Author's Self Archiving Policies, I confirm this Work has not been accepted for publication elsewhere, is not being considered for publication elsewhere and does not duplicate material already published. I confirm all authors consent to publication of this Work and authorise the granting of this licence.

# The psychosocial impact on frontline health and social care professionals in the UK during the COVID-19 pandemic: a qualitative interview study.

Henry Aughterson<sup>1</sup>, Alison McKinlay<sup>1</sup>, Daisy Fancourt<sup>1</sup>, Alexandra Burton<sup>1</sup>

1. University College London Research Department of Epidemiology and Public Health, Behavioural science and health  
London, UK

Correspondence to Henry Aughterson [henry.aughterson.14@ucl.ac.uk](mailto:henry.aughterson.14@ucl.ac.uk)

## Abstract

**Objectives** To explore the psychosocial well-being of health and social care professionals working during the COVID-19 pandemic.

**Design** This was a qualitative study deploying in-depth, individual interviews, which were audio-recorded and transcribed verbatim. Thematic analysis was used for coding.

**Participants** This study involved 25 participants from a range of frontline professions in health and social care.

**Setting** Interviews were conducted over the phone or video call, depending on participant preference.

**Results** From the analysis, we identified 5 overarching themes: communication challenges, work-related stressors, support structures, personal growth, and individual resilience. The participants expressed difficulties such as communication challenges and changing work conditions, but also positive factors such as increased team unity at work, and a greater reflection on what matters in life.

**Conclusions** This study provides evidence on the support needs of health and social care professionals amid continued and future disruptions caused by the pandemic. It also elucidates some of the successful strategies (such as mindfulness, hobbies, restricting news intake, virtual socialising activities) deployed by health and social care professionals that can support their resilience and well-being and be used to guide future interventions.

**Keywords** COVID-19 pandemic, mental health, resilience, coping strategies, healthcare workers, carers, social workers, qualitative research, UK

## Strengths and limitations of this study

- This is the first study in the UK to interview both health and social care professionals working in a range of settings on their experiences working through COVID-19.
- This study used a strong theoretical approach to inform the topic guide, and one-to-one interviews allowed in-depth analysis of the psychosocial experiences of health and social care professionals, complementing the wider availability of quantitative evidence.

- We interviewed a wide range of professions, which provided breadth of experience but might limit the specificity of findings.
- Given the fluctuating nature of the pandemic, attitudes of health and social care professionals may change over time. This can be challenging to capture during a single interview, however we did ask questions on how their experience had progressed longitudinally.
- Our sample may have been biased towards people who had more free time to participate and so were coping better than others. However, our sample still described a number of stressful experiences during the pandemic, and it is also possible that workers who were frustrated or stressed wished to express their views.

## Introduction

To control the spread of the COVID-19 pandemic, epidemiological measures were taken across the globe, with responses differing between nations depending on their own public health circumstances, scientific advice and political priorities (1). In the UK, from March 23<sup>rd</sup> this involved a national 'lockdown', involving significant restrictions on citizens' way of life including measures such as 'staying at home', social distancing and the closure of workplaces, shops and other services (2). Specific lockdown measures were eased over time, but major constraints and the progressive tightening and relaxing of such restraints remained for substantial periods.

Some professions, known as 'key workers', considered to provide an essential service to the public, were excluded from various restrictions and continued working throughout the pandemic. Crucially, health and social care professionals were designated as key workers to enable their continued support for patients and clients throughout the UK's National Health Service (NHS) and social care system. When measures were first announced, significant concerns arose around lack of capacity within the NHS, limited personal protective equipment (PPE) and staff burnout (3). Previous research exploring the psychological impact on health and care professionals during epidemics such as SARS (Severe Acute Respiratory syndrome) and MERS (Middle East Respiratory Syndrome), has highlighted the adverse psychological effects that frontline health work during epidemics can have (4–6). There is also emerging evidence during the COVID-19 pandemic that healthcare workers experienced heightened levels of stress and anxiety (7–11), depression (8,9,12) and poor sleep quality (8,13).

There are a number of reasons why health and care workers can experience adverse psychological consequences in epidemics. First, rising cases of a new infection can lead to longer hours, more intense working environments, and work-life imbalance, which disrupt the equilibrium between work demands and workers' response capacity (14). This, coupled with a lack of control, unclear job expectations, and lack of social support at work are the components of 'professional burn-out' (15). Concerns about the mental health and wellbeing of health and social care professionals in the UK were growing prior to the Covid-19 pandemic,

1  
2  
3 with 'professional burnout' recognised as a particular challenge (15,16). Moreover, there is evidence one may  
4 feel they lack the tools to manage ('loss of manageability') the confusion created by diagnosing and treating an  
5 unknown infection ('loss of comprehensibility') and experience a reduction of work to essential rather than  
6 meaningful patient interactions ('loss of meaningfulness') which combined may disrupt their 'sense of  
7 coherence' (SOC) (a measure of how well one is able to cope with stressors) (17,6,18,19). This disruption has  
8 been found to adversely affect mental health (the SOC theory informed part of our interview guide; See  
9 'Methods') (20). However, equally there is evidence demonstrating that health and care workers have  
10 moderate to high levels of psychological resilience during times of pandemics (21), and so it is unclear whether  
11 or not they will have a robust, or disrupted, sense of coherence during COVID. Third, staff may be concerned  
12 about their own risks from exposure to a new pathogen, or the risks that they might infect family or friends.  
13 These concerns can be particularly acute when the aetiology and outcomes from a new virus are not well  
14 understood (6).  
15  
16  
17  
18  
19  
20  
21  
22

23 There are few published qualitative studies that have investigated the psychosocial impact of the COVID-19  
24 pandemic on both health and social care professionals within the UK. One qualitative study interviewing 30  
25 hospital-based healthcare workers in the UK found heightened anxiety related to PPE issues and lack of  
26 training in new skills (17), while another study with nurses and support workers in care settings identified a  
27 lack of pandemic preparedness, heightened anxiety, shortage of PPE and ever-changing PPE guidance (22). It is  
28 unclear what the psychosocial challenges faced by other health and care workers are – such as GPs, mental  
29 health and social workers. Moreover, current research on health and care workers during COVID-19 has  
30 predominantly been quantitative, using pre-assumed hypotheses of negative effects. However, in previous  
31 pandemics such as SARS and MERS, there were some positive outcomes including a more positive outlook  
32 towards work, growth under pressure, greater comradery with colleagues, and a strong sense of professional  
33 responsibility and personal development (5,6). A UK study interviewing hospital-based healthcare workers  
34 during COVID-19 also found increased solidarity between colleagues and high levels of morale (17).  
35  
36  
37  
38  
39  
40  
41  
42

43 There is a need for qualitative research to explore factors that may have helped alleviate distress amongst  
44 health and social care workers during the pandemic. This is crucial in order to provide richer data of their  
45 experiences to aid our understanding of specific stressors, guide future support and interventions both as  
46 COVID-19 continues, and also in the occasion of future pandemics and stressful situations within the NHS. The  
47 aims of this study were to explore: (1) The impact of the COVID-19 pandemic overall on the working  
48 lives and mental health of health and social care professionals, and (2) the factors that contribute to the  
49 resilience of health and social care professionals during the pandemic.  
50  
51  
52  
53  
54

## 55 **Methods**

### 56 Sample and recruitment:

57 We recruited health and social care professionals from across the UK using social media, personal contacts,  
58 newsletters and from a sample of participants taking part in a large, nationwide, quantitative survey study: the  
59  
60

1  
2  
3 UCL COVID-19 Social Study (23). This research forms a qualitative component of this larger study. 25  
4 participants, from a range of frontline professions within health and social care, were recruited and  
5 interviewed between May 1<sup>st</sup> and September 17<sup>th</sup> (Table 1). Sampling was purposive to include a range of ages,  
6 ethnicity, gender and professional roles. Interviews ceased when saturation was reached and the lead author  
7 identified no new themes. Presentation of recruitment, data collection and analysis are aligned with the  
8 COREQ criteria for reporting qualitative research (24).  
9  
10  
11  
12  
13

#### 14 Data collection:

15 Semi-structured, one-to-one, telephone or video interviews were conducted by HA (PhD student and trainee  
16 medic) and AB (mental health services researcher) exploring the impact of the pandemic on participants' social  
17 lives, work life, and mental health. The interviews lasted an average of 51 minutes (range 29-93). Berkman's  
18 social networks framework and Antonovsky's sense of coherence (SOC) theory informed the topic guide  
19 questions on social life and mental health, respectively (25,20). The full Topic Guide is provided in  
20 Supplementary Material and exemplary questions are provided in Figure 1. All participants were given a  
21 Participant Information Sheet and encouraged to ask questions. Written informed consent was then obtained  
22 and a demographics form completed by all participants. We audio-recorded interviews with participants'  
23 consent, and recordings were transcribed by a professional transcription service.  
24  
25  
26  
27  
28  
29  
30

#### 31 **[Figure 1 to go ~ here]**

32  
33  
34 Figure 1: Examples of Questions in the Topic Guide  
35  
36

#### 37 **Patient and public involvement**

38  
39 The study participants or public were not involved in the design of the study, the conduct of the study, the  
40 writing of the paper nor in the dissemination of the study results. However, participants will be sent study  
41 results if requested, and the findings will be shared with the wider public through newsletters (the MARCH  
42 network) and social media.  
43  
44  
45

#### 46 Data analysis:

47  
48 The analytical approach deployed was reflexive thematic analysis (26). This followed the steps described by  
49 Braun and Clarke (27) of familiarisation with the data, generation and definition of codes, theme searching,  
50 and producing the report. HA and AM (research psychologist) independently coded four transcripts, which  
51 were discussed before HA coded and interpreted all remaining transcripts, continuing until saturation was  
52 reached and no new codes identified. A deductive approach was used to develop the initial coding framework  
53 based on concepts in the topic guide, followed by an inductive coding approach as new concepts were added  
54 to the framework based on the data. Contradictory data and context around codes was retained, to capture  
55 subtle nuances. Codes were then grouped into themes, with each theme representing a meaningful pattern in  
56  
57  
58  
59  
60

the data. All final themes were agreed by study authors. Weekly team meetings with researchers from the qualitative COVID-19 Social Study team were also utilised to discuss and develop findings. The software utilised for coding was NVivo qualitative data analysis, Version 12 (28).

## Results

We interviewed 25 participants, from a range of professions within health and social care including doctors, nurses, carers and social workers working in hospital, residential, community and primary care settings. Participants were aged 26-65, predominantly female (80%) and White British (68%).

Table 1: Characteristics of the health and social care professionals

|                        |                                                                                                                                                                                                                                                                  |
|------------------------|------------------------------------------------------------------------------------------------------------------------------------------------------------------------------------------------------------------------------------------------------------------|
| Number of participants | 25                                                                                                                                                                                                                                                               |
| Profession             | Hospital doctor (6)<br>GP (4)<br>Hospital nurse (3)<br>Social worker (3)<br>Home carer (2)<br>Care home carer (2)<br>Assistant psychologist (1)<br>Community nurse (1)<br>Practice nurse (1)<br>Counsellor & psychotherapist (1)<br>Academic physiotherapist (1) |
| Age                    | Range 26-65                                                                                                                                                                                                                                                      |
| Gender                 | Male 5<br>Female 20                                                                                                                                                                                                                                              |
| Ethnicity              | White British 17<br>Asian 3<br>Black British 2<br>White & Asian 1<br>White Irish 1<br>White Other 1                                                                                                                                                              |

### Themes:

5 primary themes were identified. These were: **Communication challenges**, **Work-related stressors**, **Support structures**, **Resilience**, and **Personal growth**. Themes and corresponding sub-themes are displayed in Figure 1.



1  
2  
3  
4  
5  
6 **[Figure 2 to go ~ here]**  
7  
8  
9  
10  
11

12 Figure 2: Themes and sub-themes  
13

## 14 **Communication challenges**

15  
16  
17 The pandemic brought with it numerous challenges around communication for health and social care  
18 professionals in their work, particularly when moving consultations online and having difficult discussions.  
19

### 20 **Virtual consulting**

21  
22 Some consultations had shifted online, especially among GPs, therapists and social workers. Several  
23 participants said that one of the key benefits was the increased efficiency of virtual communication and  
24 consultations.  
25  
26

27  
28  
29 “much more is done remotely, which is just so much more efficient, because patients don’t always need to be  
30 seen face to face. Patients preferred it, we preferred it.” (Participant\_16\_GP)  
31

32  
33 However, more often participants talked about the limitations of virtual consultations. Some found it difficult  
34 to provide appropriate emotional support, especially in a time where there was heightened need. This was  
35 more commonly an issue for social care, mental health and palliative care professionals supporting vulnerable  
36 adults or children.  
37  
38

39  
40  
41 “It makes me realise the importance of seeing someone face to face to actually support them. I just don’t think  
42 a telephone call or a Zoom call is sufficient when it comes to helping people who have profound mental health  
43 issues, or even mild mental health issues. And I think that some people just need the power of touch or a hug  
44 or a face-to-face human person to ensure that they’re kept safe and okay” (Participant\_4\_Hospital  
45 doctor\_palliative\_care\_registrar)  
46  
47  
48

49  
50 Participants often found it difficult to build new relationships virtually, especially when working with children:  
51

52  
53 “I think if you already know someone well, and you are speaking to them on video call, then that’s fine  
54 because you’ve already established the relationship... but if you have to start establishing the relationship on a  
55 video call...there is something missing I think, especially working with children... especially if you have a child  
56 that’s introverted or struggles to communicate or has learning difficulties or is very shy. It’s harder to make  
57 them feel comfortable when you’re on video call” (Participant\_10\_social\_worker)  
58  
59  
60

1  
2  
3  
4  
5 Participants talked about difficulties identifying crucial signs of deterioration in health from patients or clients,  
6 e.g. from body language:  
7

8  
9 “we have to be able to pick up signs, for instance, if they are suicidal, I think there’s an anxiety there that doing  
10 it online, it’s difficult sometimes to do that, to pick up on some nuances of the way they talk... we can’t see  
11 their whole body language” (Participant\_9\_counsellor&psychotherapist)  
12  
13

14  
15 Participants, especially mental health and social workers, experienced difficulty ensuring a confidential space  
16 when consulting virtually:  
17

18  
19 “When they’re (children) talking to you, perhaps you see them in a room and it seems like they’re alone. But  
20 actually, maybe they have all their family members that are standing in the corner”  
21  
22 (Participant\_10\_social\_worker)  
23  
24

### 25 26 **Difficult conversations**

27 A common challenge during this period was an increase in difficult conversations with patients, clients and  
28 their family members. The need for PPE, and virtual consultations, accentuated these difficulties. This was  
29 especially apparent in those working in services that provide mental health and palliative care.  
30  
31

32  
33 “Family communication is awful these days... You can’t see someone, and you’re speaking to them on the  
34 phone, and you’re telling them that they can’t come and see their loved one, and that their loved one might  
35 well die, that’s an awful conversation to have with someone...it’s definitely one of the worst things about  
36 COVID for me” (Participant\_8\_Hospital\_doctor)  
37  
38  
39

40  
41 Several participants said they were providing more emotional support to patients and clients than usual:  
42

43  
44 “There’s been a huge amount of emotional support that we’ve had to give through anxiety, through grief. All  
45 that has been heightened quite greatly really. And a deeper sense of sadness in yourself, that you’re trying to  
46 support people and having that empathy for them, thinking this is just absolutely horrendous for them”  
47  
48 (Participant\_20\_Home\_carer)  
49  
50

### 51 52 **Work-related stressors**

53  
54 Health and social care professionals experienced a range of challenging emotions and psychological difficulties.  
55  
56  
57  
58  
59  
60

### The need to protect loved ones

Nearly all participants spoke about ongoing worry for friends and family compounded by a fear of transmitting the virus to them – due to participants' increased risk of catching it at work.

"Normally I would see my mum every day... but where I work, I was worried, I was more at risk to catch anything, so I definitely didn't. My sisters were actually going into the garden, and talking to her... but I wouldn't, so I was standing at the gate. So that was pretty hard, because I'm very close to my mum"

(Participant\_21\_Care\_home\_manager&carer)

### Increased workload and changing work conditions

Fatigue and exhaustion were commonly reported by participants throughout this period.

"I'm just feeling really run down... I literally have 4 or 5 weeks where I've not left the house unless it's just to pop to the supermarket... I find that really does impact me... it's like work has taken over my whole life and I'm exhausted" (Participant\_11\_Family\_support\_worker)

Whilst not unanimous, some participants experienced longer working hours and increased workload.

"my routine was really like... wake up, eat something, go into work, which as shifts as nurses we had to stay in the hospital for 12 and a half hours...go home and eat something, drink something, go to sleep... then wake up and then go to work again... we have been extremely busy compared to the normality"

(Participant\_19\_Hospital\_nurse)

Feelings of fatigue were also enhanced by the tenuous nature of PPE:

"you just become quite tired...it culminated with masks, visors, aprons, hot weather and regulations changing and sometimes you'd come home from a shift and feel you'd been pulled in all directions really"

(Participant\_20\_Home\_carer&nurse)

### Public not following the rules

Some participants experienced frustration with members of the public not following social distancing and other guidelines, feeling that their work on the frontline was being undermined.

"I've been quite annoyed... you're trying your best in lockdown to obey the government guidelines and I think I've had a huge amount of frustration by hearing and seeing people who haven't...certain politicians as well that haven't stuck to guidelines, and I feel sometimes I've been working my socks off and felt quite cheated"

(Participant\_20\_Home\_carer&nurse)

### Uncertainty of risk to patients

A common concern was making decisions that balanced the complex, and often unknown, risks associated with the virus along with other health risks. This was particularly difficult during the early phases of the pandemic, when less was known about the virus.

“...sometimes I’ve thought, right, we do need to bring patients in, but then are you putting them at more risk exposing them to the virus, which could actually kill them, and actually they could potentially just have a gastro bug and not bowel cancer?” (Participant\_16\_GP)

### Support structures

The availability of support structures at work and home was identified as an important buffer for the psychosocial impact of working during the pandemic and in coping with considerable work-related changes.

#### Team unity:

Many participants felt closer to their team, and that team unity had increased during the pandemic, united over a common cause. This was more likely if teams were cohesive before the pandemic, and was particularly apparent for doctors in primary and secondary care.

“just having the vibes that we’re all in this together and we’re all going (through) the same thing, and we’re pulling in the same direction” (Participant\_3\_Hospital\_doctor\_intensive\_care)

Some of this unity was facilitated through virtual communication:

“We actually started up a group, ourselves, on WhatsApp. It’s just our team, it doesn’t include management. It’s just for family support workers and social workers... we try not to put work stuff on there... we try to send each other funny messages or memes... to keep us going” (Participant\_11\_family\_support\_worker)

Some participants felt the increase in virtual meetings improved attendance, due to the ease of just being able to “dial in” and improved collaborative working among multidisciplinary teams.

“when we’re safeguarding a child, you are supposed to work collaboratively... it’ll be social care and school, health, maybe a youth organisation or domestic abuse organisation... when you’re doing these physical meetings, beforehand, people just wouldn’t turn up... but now, they can just dial in”

(Participant\_23\_Social\_worker)

1  
2  
3 However, team unity was not unanimous, with several participants experiencing loneliness, due to an increase  
4 in lone working or working from home.  
5  
6

7  
8 “there was a time...I was then at home isolating for two weeks, and so I was working from home. I had remote  
9 access to my computer, so I was doing purely telephone consultations from home and I felt very isolated  
10 there, and I didn’t feel like I was part of the team at all” (Participant\_13\_GP)  
11  
12

13  
14 A few participants also described difficulties connecting with colleagues virtually for support:  
15

16  
17 “I think it could have been improved by seeing each other face-to-face, and I have to say that has been really  
18 detrimental to our team. I think you lose a lot by not seeing someone face to face, in terms of their body  
19 language and non-verbal cues aren’t always captured particularly well through IT”  
20  
21 (Participant\_4\_Hospital\_doctor\_palliative\_care\_registrar)  
22  
23

## 24 Leadership

25  
26  
27 Participants expressed frustration about government handling and changing advice throughout the pandemic.  
28 In particular, participants talked about confusing guidance received from management and government  
29 regarding PPE or distancing procedures at work, as well as the speed in which the guidance changed.  
30  
31

32  
33 “I know they (upper management in NHS) have difficult decisions to make quickly but I sometimes find their  
34 rule making quite vague. A bit like the government, I feel like they’re making it up as they go along somewhat.  
35 And it changed every day so you’d log onto your emails and there’d be some new change”  
36  
37 (Participant\_15\_community\_mental\_health\_nurse)  
38  
39

40  
41 However, some felt the culture of blame itself was frustrating:  
42

43  
44 “the other thing that annoys me sometimes is that... everyone wants to blame everybody...it’s like the blame  
45 game...everybody has to blame Boris... Somebody’s responsible. China’s responsible... I feel that illnesses and  
46 viruses have been around forever and ever and ever... you can’t really be pointing the finger all the time, and I  
47 find it quite depressing” (Participant\_12\_Hospital\_doctor\_critical\_care)  
48  
49

50  
51 Most participants felt supported at work and received regular emotional and practical check-ins from  
52 management. A small number felt ignored by management, which led to feelings of being overwhelmed:  
53  
54

55  
56 “I was quite anxious about being in the office with COVID... I had some colleagues of mine who were able to  
57 work from home... I was told that this wasn’t possible... it was business as usual. It was a real sense of  
58  
59  
60

1  
2  
3 frustration, not feeling that you're being listened to by my manager and just a sense of feeling overwhelmed  
4 and quite helpless about the situation" (Participant\_24\_Assistant\_psychologist)  
5  
6  
7

### 8 Social support

9 Most participants had supportive relationships with family, friends and colleagues, which helped contribute to  
10 a sense of resilience among participants.  
11  
12

13  
14 "I've got a good, strong marriage and we're a good partnership, my husband and I, and we've supported each  
15 other through all this... our friends are going through similar things, so I'm able to talk to my friends as well.  
16 I've got a good network of friends, so I'm very lucky." (Participant\_20\_Home\_carer&nurse)  
17  
18

19 They also felt supported by their local community, and the public, e.g. through the 'Clap for Carers' movement  
20 where people across the country stood outside their front door once a week to applaud health and care  
21 workers for their contribution:  
22  
23

24  
25  
26 "the Clap for Carers thing, the neighbours would come out and clap, and I found that quite touching... quite  
27 uplifting actually" (Participant\_12\_Hospital\_doctor\_critical\_care)  
28  
29

### 30 Resilience

31  
32  
33 Despite the difficulties and challenges, most participants said they experienced psychosocial benefits during  
34 the pandemic, which many attributed to their individual coping style or sense of resilience.  
35  
36  
37

### 38 Proactive coping

39 Most participants said they used well-developed coping mechanisms to deal with the ever-changing  
40 circumstances, including engaging in hobbies, participating in virtual activities, and maintaining routines.  
41  
42  
43

44  
45 "I do genuinely believe getting out into nature has a really good impact on one's mental health and it certainly  
46 does on mine...Crafting, doing things, keeping busy...that's really important for your mental health having that  
47 occupations. I crochet... we paint, we draw, we make jewellery..."  
48  
49

50 (Participant\_15\_Community\_mental\_health\_nurse)  
51  
52

53 Many participants discussed the negative impact of constant news coverage on coronavirus and the death  
54 count, and intentionally restricted their news intake as they felt it was unhelpful, even harmful to their mental  
55 health:  
56  
57  
58  
59  
60

1  
2  
3 “the virus messes with your head more than it does your body, if you’re not hospitalised. That’s just down to  
4 the media at the end of the day. There’s so much media and so much emphasis on death, not so much on  
5 recovery” (Participant\_7\_Hospital\_nurse)  
6  
7  
8

### 9 10 **Accepting uncertainty**

11 Most participants had a degree of personal, psychological resilience linked to an acceptance, or ‘letting go’, of  
12 what they had no control over, such as the overall outcome of the pandemic or government restrictions.  
13

14  
15 “I’m generally much less anxious now than I was in January and February. And part of that, I think, is about  
16 thinking a lot more about death and being a lot more accepting about death, and about what you can control  
17 and what’s out of your control” (Participant\_14\_GP)  
18  
19

20  
21 Part of this philosophy seemed to be influenced by their previous experiences, and their profession:  
22

23  
24 “Because of my job, I think I’m aware that we’re not really in control of lots of things in our life... I see that all  
25 the time with patients and people I care for... we don’t have control over everything and we have to have a  
26 level of acceptance for that” (Participant\_15\_community\_mental\_health\_nurse)  
27  
28  
29

### 30 31 **Increased sense of purpose and reward**

32 Most participants expressed gratitude for being able to continue working. This brought with it benefits such as  
33 purpose, daily structure, predictability, a degree of socialising and being ‘in-the-know’ about the virus.  
34

35 Participants also talked about how it felt good to be able to contribute. For many, this was highly rewarding  
36 and brought a heightened sense of purpose.  
37  
38

39  
40 “...some people would view me as not being lucky, because I’m a frontline worker, but that’s my job and that’s  
41 what I’m trained to do, so I don’t view that as unlucky... I have been lucky in the sense that I’ve been able to  
42 keep busy, to keep working, to feel I’m contributing” (Participant\_17\_GP)  
43  
44

45  
46 Guilt occurred when participants weren’t able to contribute as much as they would have liked e.g. they were  
47 told they couldn’t work because they were high-risk, or had to work from home.  
48  
49

50  
51 “at first, I felt incredibly guilty by the fact that I wasn’t helping out on the frontline because I was pregnant. I  
52 was just told I’m not allowed to see any patients, by occupational health, and sent home”  
53 (Participant\_6\_Hospital\_doctor)  
54  
55

### 56 57 **Personal growth**

58  
59 The pandemic also brought with it opportunities for personal growth among participants.  
60

### Increased reflection

Many participants experienced a greater reflection on “what matters” in their lives. Commonly this was spending quality time with friends and family and appreciating the small things in life.

“one benefit is that actually we quite like a simple life and actually you come to appreciate the very simple things, which are just being outside, going for a bike ride, having a picnic...just the health and happiness of your own family is what’s important and everything else, you can generally sort out” (Participant\_17\_GP)

### Slowing down

Many participants discussed how the pandemic had given them a chance to slow down and have more “me-time” and expressed this was something they wished to take forward beyond the pandemic. This view may seem in conflict with the increased workload experienced by some participants, but reflected the changes outside of work, e.g. having fewer social obligations due to social distancing restrictions.

“We have really busy lives generally, and we spend a lot of time rushing around doing lots of stuff, and actually this time has been quite nice in many ways as a period to kind of slow down a bit and I think just appreciating each other” (Participant\_1\_Hospital\_doctor)

### Improved non-work relationships

Whilst not unanimous, many participants talked about how some of their relationships with others improved during the pandemic, especially with family members they lived with, the crisis having brought them closer.

“I’ve connected with my family a lot more... I feel really good about spending more time with my daughter...that’s time that I would never have had with her, so that’s really special”  
(Participant\_5\_academic\_respiratory\_physiotherapist)

## Discussion

This qualitative interview study explored the psychosocial impact of the COVID-19 pandemic on health and social care professionals in the UK. We identified five key themes shared between professionals’ accounts. The main difficulties reported were ‘communication challenges’ (consisting of ‘virtual consulting’ and ‘difficult conversations’) and ‘work-related stressors’ (consisting of ‘need to protect loved ones’, ‘public not following rules’, ‘increased workload and changing work conditions’ and ‘uncertainty of risk to patients’). Three factors appeared to mitigate some of the psychological distress of the pandemic: ‘support structures’ (consisting of ‘team unity’, ‘leadership’ and ‘social support’), ‘resilience’ (consisting of ‘proactive coping’, ‘accepting uncertainty’ and ‘increased sense of purpose and reward’) and ‘personal growth’ (consisting of ‘slowing down’, ‘increased reflection’ and ‘improved relationships’).



1  
2  
3  
4  
5 The themes were drawn from interviews with professionals working in different areas of health and social  
6 care, and some themes were felt more strongly in certain jobs than others. For example, GPs and social  
7 workers enjoyed the efficiency of new virtual consultations, but GPs found it difficult to use with older adults  
8 and those with age-related cognitive decline. Those working with mental health clients, such as  
9 psychotherapists and social workers, experienced digital connectivity issues when communicating with  
10 vulnerable clients, leading to frustrating repetitions and difficulties building a trusting relationship. This  
11 corroborates findings from previous research on barriers to virtual consulting (29). Those working with older  
12 adults, found one of the most challenging elements of the pandemic was having difficult conversations over  
13 the telephone with loved ones of patients who were dying - often having to convey that visiting restrictions  
14 meant they would be unable to say goodbye in person. This is potentially concerning for the well-being of  
15 patients and healthcare professionals, given previous research has highlighted the importance of an  
16 appropriate physical and social setting in breaking bad news, and also the presence of family members (30,31).

17  
18  
19  
20  
21  
22  
23  
24 There were a number of common work-related stressors among participants. One of these was frustration  
25 with members of the public not following the social distancing and hygiene regulations, and with the  
26 government's handling of the pandemic. Some also expressed frustration at the 'culture of blame' that they  
27 felt permeated the media and public discourse, which can be maladaptive and harmful for one's own mental  
28 well-being (32). Emotional and physical fatigue were also common experiences across all professions,  
29 corroborating qualitative studies of health and care workers during COVID-19 and previous pandemics globally  
30 (4,5,33). Many participants were worried about putting their loved ones at risk of catching COVID-19 as  
31 highlighted by previous research (34), however in our study it appears to have been a particular concern  
32 amongst carers and hospital doctors/nurses, perhaps due to their higher level of virus exposure.

33  
34  
35  
36  
37  
38  
39  
40 Most participants experienced an increased sense of team unity; that they were 'all in this together' fighting a  
41 common enemy. This may have led to a degree of resilience against some of the stressful elements of working  
42 in a pandemic, supporting findings from previous pandemics (5,10). Moreover, supporting Berkman's social  
43 networks theory (35) which informed part of our interview guide, strong social relationships were frequently  
44 cited by participants as key supportive mechanisms for their mental health during this period, including  
45 supportive partners at home, friends, family and colleagues. Those participants that did experience loneliness  
46 at work during the pandemic were lone workers, working from home, or described unsupportive  
47 management. In line with our findings, a recent systematic review of quantitative studies examining the  
48 impact of COVID-19 on healthcare workers found social support to be a vital resource underlying their ability  
49 to cope (21).

50  
51  
52  
53  
54  
55  
56 Participants also described using their own internal resilience as a way to buffer many of the key stressors  
57 involved in working through the pandemic, and even thrive at times. They adopted proactive coping  
58 mechanisms, as seen in healthcare workers during SARS (36). These often involved partaking in activities that  
59  
60

1  
2  
3 now have substantial evidence for their role in improving mental health including: exercise (37), arts and crafts  
4 (38), spending time in nature (39,40), virtual activities with friends, and maintaining a healthy routine (41,42).  
5  
6 Consistent with research from previous pandemics and recent quantitative data during COVID-19, participants  
7  
8 also restricted their news intake, particularly as they felt the constant reporting of COVID-19 and the prevalent  
9  
10 discourse of blame negatively impacted their mental health (6,23).

11  
12 Most participants said they were successfully able to ‘let go’ of aspects of the pandemic that they felt were out  
13  
14 of their control, such as the overall course of the virus and government restrictions. This demonstrates a  
15  
16 psychological theory known as ‘radical acceptance’ (43), and may have been responsible in part for the  
17  
18 resilience reported by many participants, also having been identified as a successful coping strategy for  
19  
20 healthcare workers in previous pandemics (36). Some academics have critiqued ‘resilience’ as a concept for its  
21  
22 focus on individual- rather than structural-level factors (44), however, participants in the study highlighted the  
23  
24 link between these factors, particularly the importance of social networks and social support structures at  
25  
26 work. Most participants also expressed gratitude for being able to continue working and described a sense of  
27  
28 increased purpose and reward for being able to contribute during the pandemic.

29  
30 Common ‘personal growth’ themes were frequently described in participant accounts. Most participants  
31  
32 reflected more on ‘what matters’ in life during this period, which included relationships with friends and  
33  
34 family, their health and the health of loved ones, and ‘appreciating the small things’ in life. These findings  
35  
36 mirror international qualitative studies looking at the psychological impact of COVID-19 and previous  
37  
38 pandemics on health and care workers which found they experienced ‘growth under pressure’ (5,33) and  
39  
40 increased gratitude and self-reflection (33). ‘Growth under pressure’ may be a closely linked (but slightly  
41  
42 diluted) concept to ‘post-traumatic growth’ seen in individuals experiencing personal growth in the aftermath  
43  
44 of highly challenging life crises (45). Lastly, participants demonstrated a high “sense of coherence” which  
45  
46 enhanced their ability to cope during stressful experiences (19). Participants spoke about ‘manageability’  
47  
48 whereby they were highly proactive in their coping mechanisms, ‘comprehensibility’ in their enhanced  
49  
50 understanding of the virus and need for social distancing restrictions, and ‘meaningfulness’ in how they  
51  
52 experienced a heightened sense of purpose through their contribution during the pandemic.

## 53 54 55 56 57 58 59 60 Strengths & Limitations

This is the first study in the UK to interview both health and social care professionals working in a range of  
settings on their experiences working through COVID-19, which we felt important as they all continued to  
provide vital frontline care during the pandemic. This study used a strong theoretical approach to inform the  
topic guide, and one-to-one interviews allowed in-depth analysis of the psychosocial experiences of health and  
social care professionals, complementing the wider breadth of quantitative evidence. There were also some  
limitations. First, we interviewed a wide range of professions, which provided breadth of experience but might  
limit the specificity of findings. However, due to similarities in the roles of health and care professionals we felt

1  
2  
3 it important to include a range of voices. Second, given the fluctuating nature of the pandemic, attitudes of  
4 health and social care professionals may change over time. This can be difficult to capture during a single  
5 interview, however we did ask questions on how their experience had progressed longitudinally. Third, our  
6 sample may have been biased towards people who had more free time to participate and so were coping  
7 better than others. However, our sample still described a number of stressful experiences during the  
8 pandemic, and it is equally possible that workers who were frustrated or stressed wished to express their  
9 views.  
10  
11  
12  
13  
14

## 15 16 Implications

17  
18 This study has important implications for health and social care workers, managers, commissioners of services  
19 and policy makers during the ongoing pandemic and beyond. First, it highlights the key stressors experienced  
20 by health and social care professionals during the COVID-19 pandemic. Many of these echo findings from  
21 previous epidemics, but whilst this is reassuring in terms of data credibility, it highlights a concerning lack of  
22 improvement in working conditions during such emergencies over the past two decades. It is vital that the  
23 challenges identified here are addressed. Health and care professionals navigating difficult conversations via  
24 telephone or video may benefit from extra training and support at work, for example in use of the WIRE-  
25 SPIKES protocol for breaking bad news remotely (46). Further, this study provides evidence for the supportive  
26 and coping mechanisms used by workers who experienced resilience during this period. Application of coping  
27 strategies including leisure activities were common and reportedly beneficial, as were the use of mindful  
28 techniques such as expressing gratitude. This suggests that health and care professionals may benefit from  
29 regular work-based interventions providing space for such activities. Whilst such activities may feel extraneous  
30 during emergency situations, the building of resilience and positive coping outside of pandemic situations and  
31 the tackling of problems such as staff burnout will likely improve staff coping capacity in future epidemic  
32 situations. Alongside this, adequate provision for social support should be ensured, from family and friends but  
33 also via the work place e.g. through enhanced supervision or peer support. The research presented here  
34 suggests that investment into wellbeing support could play a vital role in helping health and care workers to  
35 manage emotional stress.  
36  
37  
38  
39  
40  
41  
42  
43  
44  
45  
46  
47

## 48 Conclusion

49  
50 To the best of our knowledge, this is the first qualitative study to explore the psychosocial impact of the  
51 COVID-19 pandemic on both health and social care professionals working in different settings across the UK.  
52 Participants experienced communication challenges and changing work conditions, but also positive factors  
53 such as increased team unity, and greater reflection on what matters in their life. This study offers important  
54 evidence for continued and future disruptions caused by the COVID-19 pandemic. It also elucidates successful  
55 psychological and practical strategies deployed by health and social care professionals that could be used to  
56 support their resilience and well-being.  
57  
58  
59  
60

## Funding statement

This COVID-19 Social Study was funded by the Nuffield Foundation [WEL/FR-000022583], but the views expressed here are those of the authors. The study was also supported by the MARCH Mental Health Network funded by the Cross-Disciplinary Mental Health Network Plus initiative supported by UK Research and Innovation [ES/S002588/1], and by the Wellcome Trust [221400/Z/20/Z]. DF was funded by the Wellcome Trust [205407/Z/16/Z].

## Ethical approval

The study was reviewed and approved by the UCL Ethics Committee (Project ID 14895/005).

## Acknowledgements

The authors would like to thank other members of the qualitative COVID-19 social study team at UCL, who helped discuss themes during the analysis stages at weekly team meetings: Dr Thomas May, Dr Anna Roberts, and Dr Joanna Dawes.

**Contributors:** DF, AB and HA conceived the study and contributed to the study design. HA conducted all the interviews apart from 1, which AB conducted. HA coded all the transcriptions. AM coded 4 transcripts for cross-checking purposes. HA wrote up the manuscript. All authors (HA, DF, AM, AB) critically reviewed the manuscript and approved the final submission.

**Competing interests:** None declared.

**Data sharing statement:** Raw data is available via participant quotations and the topic interview guide is provided in Supplementary Material.

## References

1. Adhikari SP, Meng S, Wu Y-J, Mao Y-P, Ye R-X, Wang Q-Z, et al. Epidemiology, causes, clinical manifestation and diagnosis, prevention and control of coronavirus disease (COVID-19) during the early outbreak period: a scoping review. *Infect Dis Poverty*. 2020 Mar 17;9(1):29.

- 1
  - 2
  - 3
  - 4
  - 5
  - 6
  - 7
  - 8
  - 9
  - 10
  - 11
  - 12
  - 13
  - 14
  - 15
  - 16
  - 17
  - 18
  - 19
  - 20
  - 21
  - 22
  - 23
  - 24
  - 25
  - 26
  - 27
  - 28
  - 29
  - 30
  - 31
  - 32
  - 33
  - 34
  - 35
  - 36
  - 37
  - 38
  - 39
  - 40
  - 41
  - 42
  - 43
  - 44
  - 45
  - 46
  - 47
  - 48
  - 49
  - 50
  - 51
  - 52
  - 53
  - 54
  - 55
  - 56
  - 57
  - 58
  - 59
  - 60
2. Iacobucci G. Covid-19: UK lockdown is “crucial” to saving lives, say doctors and scientists. *BMJ* [Internet]. 2020 Mar 24 [cited 2020 Sep 3];368. Available from: <https://www.bmj.com/content/368/bmj.m1204>
  3. Shaw SCK. Hopelessness, helplessness and resilience: The importance of safeguarding our trainees’ mental wellbeing during the COVID-19 pandemic. *Nurse Educ Pract*. 2020 Mar;44:102780.
  4. McAlonan GM, Lee AM, Cheung V, Cheung C, Tsang KWT, Sham PC, et al. Immediate and sustained psychological impact of an emerging infectious disease outbreak on health care workers. *Can J Psychiatry*. 2007 Apr;52(4):241–7.
  5. Kim Y. Nurses’ experiences of care for patients with Middle East respiratory syndrome-coronavirus in South Korea. *American Journal of Infection Control*. 2018 Jul 1;46(7):781–7.
  6. Lee S-H, Juang Y-Y, Su Y-J, Lee H-L, Lin Yi-Hui, Chao C-C. Facing SARS: psychological impacts on SARS team nurses and psychiatric services in a Taiwan general hospital. *General Hospital Psychiatry*. 2005 Sep 1;27(5):352–8.
  7. Kang L, Li Y, Hu S, Chen M, Yang C, Yang BX, et al. The mental health of medical workers in Wuhan, China dealing with the 2019 novel coronavirus. *The Lancet Psychiatry*. 2020 Mar 1;7(3):e14.
  8. Lai J, Ma S, Wang Y, Cai Z, Hu J, Wei N, et al. Factors Associated With Mental Health Outcomes Among Health Care Workers Exposed to Coronavirus Disease 2019. *JAMA Netw Open*. 2020 Mar 23;3(3):e203976.
  9. Du J, Dong L, Wang T, Yuan C, Fu R, Zhang L, et al. Psychological symptoms among frontline healthcare workers during COVID-19 outbreak in Wuhan. *Gen Hosp Psychiatry* [Internet]. 2020 Apr 3 [cited 2020 Oct 26]; Available from: <https://www.ncbi.nlm.nih.gov/pmc/articles/PMC7194721/>
  10. Sun N, Wei L, Shi S, Jiao D, Song R, Ma L, et al. A qualitative study on the psychological experience of caregivers of COVID-19 patients. *American Journal of Infection Control*. 2020 Jun 1;48(6):592–8.
  11. Xiao H, Zhang Y, Kong D, Li S, Yang N. The Effects of Social Support on Sleep Quality of Medical Staff Treating Patients with Coronavirus Disease 2019 (COVID-19) in January and February 2020 in China. *Med Sci Monit*. 2020 Mar 5;26:e923549-1-e923549-8.
  12. Lu W, Wang H, Lin Y, Li L. Psychological status of medical workforce during the COVID-19 pandemic: A cross-sectional study. *Psychiatry Res*. 2020 Jun;288:112936.
  13. Huang Y, Zhao N. Generalized anxiety disorder, depressive symptoms and sleep quality during COVID-19 outbreak in China: a web-based cross-sectional survey. *Psychiatry Res*. 2020 Jun;288:112954.
  14. Quick TL. Linking productivity and health. *Healthy Work: Stress, Productivity, and the Reconstruction of Working Life* Robert Karasek and Tores Theorell New York: Basic Books, Inc. 1990 \$29.95 Canada \$39.95 381 pages. *National Productivity Review*. 1990;9(4):475–8.
  15. Imo UO. Burnout and psychiatric morbidity among doctors in the UK: A systematic literature review of prevalence and associated factors. *BJPsych Bulletin*. 2017 Aug;41(4):197–204.
  16. Coyle D, Edwards D, Hannigan B, Fothergill A, Burnard P. A systematic review of stress among mental health social workers. *International Social Work*. 2005 Mar 1;48(2):201–11.
  17. Vindrola-Padros C, Andrews L, Dowrick A, Djellouli N, Fillmore H, Gonzalez EB, et al. Perceptions and experiences of healthcare workers during the COVID-19 pandemic in the UK. *BMJ Open*. 2020 Nov 1;10(11):e040503.
  18. Williamson V, Murphy D, Greenberg N. COVID-19 and experiences of moral injury in front-line key workers. *Occup Med (Lond)*. 2020 Jul 17;70(5):317–9.

19. Eriksson M. The Sense of Coherence in the Salutogenic Model of Health. In: Mittelmark MB, Sagy S, Eriksson M, Bauer GF, Pelikan JM, Lindström B, et al., editors. *The Handbook of Salutogenesis* [Internet]. Cham (CH): Springer; 2017 [cited 2019 Nov 27]. Available from: <http://www.ncbi.nlm.nih.gov/books/NBK435812/>
20. Eriksson M, Lindstrom B. Antonovsky's sense of coherence scale and its relation with quality of life: a systematic review. *Journal of Epidemiology & Community Health*. 2007 Nov 1;61(11):938–44.
21. Labrague LJ. Psychological resilience, coping behaviours, and social support among healthcare workers during the COVID-19 pandemic: a systematic review of quantitative studies. *medRxiv*. 2020 Nov 6;2020.11.05.20226415.
22. Nyashanu M, Pfende F, Ekpenyong M. Exploring the challenges faced by frontline workers in health and social care amid the COVID-19 pandemic: experiences of frontline workers in the English Midlands region, UK. *Journal of Interprofessional Care*. 2020 Sep 2;34(5):655–61.
23. Bu F, Steptoe A, Mak HW, Fancourt D. Time-use and mental health during the COVID-19 pandemic: a panel analysis of 55,204 adults followed across 11 weeks of lockdown in the UK. *medRxiv*. 2020 Aug 21;2020.08.18.20177345.
24. Tong A, Sainsbury P, Craig J. Consolidated criteria for reporting qualitative research (COREQ): a 32-item checklist for interviews and focus groups. *Int J Qual Health Care*. 2007 Dec 1;19(6):349–57.
25. Berkman LF. The Assessment of Social Networks and Social Support in the Elderly. *Journal of the American Geriatrics Society*. 1983;31(12):743–9.
26. Braun V, Clarke V. Reflecting on reflexive thematic analysis. *Qualitative Research in Sport, Exercise and Health*. 2019 Aug 8;11(4):589–97.
27. Braun V, Clarke V. Using thematic analysis in psychology. *Qualitative Research in Psychology*. 2006 Jan;3(2):77–101.
28. QSR International Pty Ltd. NVIVO [Internet]. [cited 2020 Nov 4]. Available from: <https://www.qsrinternational.com/nvivo-qualitative-data-analysis-software/home>
29. Donaghy E, Atherton H, Hammersley V, McNeilly H, Bikker A, Robbins L, et al. Acceptability, benefits, and challenges of video consulting: a qualitative study in primary care. *Br J Gen Pract*. 2019 Sep 1;69(686):e586–94.
30. Monden KR, Gentry L, Cox TR. Delivering Bad News to Patients. *Baylor University Medical Center Proceedings*. 2016 Jan 1;29(1):101–2.
31. Ptacek JT, Fries EA, Eberhardt TL, Ptacek JJ. Breaking bad news to patients: physicians' perceptions of the process. *Support Care Cancer*. 1999 Apr 1;7(3):113–20.
32. Tennen H, Affleck G. Blaming others for threatening events. *Psychological Bulletin*. 1990;108(2):209–32.
33. Sun N, Wei L, Shi S, Jiao D, Song R, Ma L, et al. A qualitative study on the psychological experience of caregivers of COVID-19 patients. *American Journal of Infection Control*. 2020 Jun 1;48(6):592–8.
34. Balasubramanian A, Paleri V, Bennett R, Paleri V. Impact of COVID-19 on the mental health of surgeons and coping strategies. *Head & Neck*. 2020;42(7):1638–44.
35. Berkman LF. *Social Networks and Health*. 2010;27.

- 1  
2  
3 36. Wong TW, Yau JKY, Chan CLW, Kwong RSY, Ho SMY, Lau CC, et al. The psychological impact of severe  
4 acute respiratory syndrome outbreak on healthcare workers in emergency departments and how they  
5 cope. *European Journal of Emergency Medicine*. 2005 Feb;12(1):13–18.  
6  
7 37. Stathopoulou G, Powers MB, Berry AC, Smits JAJ, Otto MW. Exercise Interventions for Mental Health: A  
8 Quantitative and Qualitative Review. *Clinical Psychology: Science and Practice*. 2006;13(2):179–93.  
9  
10 38. Fancourt D, Finn S. What is the evidence on the role of the arts in improving health and well-being? A  
11 scoping review [Internet]. WHO Regional Office for Europe, Copenhagen; 2019. (WHO Health Evidence  
12 Network Synthesis Reports). Available from: <http://europepmc.org/books/NBK553773>  
13  
14 39. Clatworthy J, Hinds J, Camic PM. Gardening as a mental health intervention: a review. *Mental Health*  
15 *Review Journal* [Internet]. 2013 Nov 29 [cited 2020 Oct 30]; Available from:  
16 <https://www.emerald.com/insight/content/doi/10.1108/MHRJ-02-2013-0007/full/html>  
17  
18 40. Kotera Y, Richardson M, Sheffield D. Effects of Shinrin-Yoku (Forest Bathing) and Nature Therapy on  
19 Mental Health: a Systematic Review and Meta-analysis. *Int J Ment Health Addiction* [Internet]. 2020 Jul 28  
20 [cited 2020 Oct 30]; Available from: <https://doi.org/10.1007/s11469-020-00363-4>  
21  
22 41. Lyall LM, Wyse CA, Graham N, Ferguson A, Lyall DM, Cullen B, et al. Association of disrupted circadian  
23 rhythmicity with mood disorders, subjective wellbeing, and cognitive function: a cross-sectional study of  
24 91 105 participants from the UK Biobank. *The Lancet Psychiatry*. 2018 Jun 1;5(6):507–14.  
25  
26 42. Lanza HI, Drabick DAG. Family Routine Moderates the Relation Between Child Impulsivity and  
27 Oppositional Defiant Disorder Symptoms. *J Abnorm Child Psychol*. 2011 Jan 1;39(1):83–94.  
28  
29 43. Robins CJ, Schmidt III H, Linehan MM. Dialectical Behavior Therapy: Synthesizing Radical Acceptance with  
30 Skillful Means. In: *Mindfulness and acceptance: Expanding the cognitive-behavioral tradition*. New York,  
31 NY, US: Guilford Press; 2004. p. 30–44.  
32  
33 44. Fletcher D, Sarkar M. Psychological resilience: A review and critique of definitions, concepts, and theory.  
34 *European Psychologist*. 2013;18(1):12–23.  
35  
36 45. Tedeschi RG, Calhoun LG. Posttraumatic Growth: Conceptual Foundations and Empirical Evidence.  
37 *Psychological Inquiry*. 2004 Jan 1;15(1):1–18.  
38  
39 46. Holstead RG, Robinson AG. Discussing Serious News Remotely: Navigating Difficult Conversations During a  
40 Pandemic. *JCO Oncology Practice*. 2020 May 18;16(7):363–8.  
41  
42 47. Kinsella P, Garland A. *Cognitive Behavioural Therapy for Mental Health Workers: A Beginner's Guide*.  
43 Routledge; 2008. 265 p.  
44  
45 48. Shapiro SL, Brown KW, Biegel GM. Teaching self-care to caregivers: Effects of mindfulness-based stress  
46 reduction on the mental health of therapists in training. *Training and Education in Professional*  
47 *Psychology*. 2007;1(2):105–15.  
48  
49 49. Cocchiara RA, Peruzzo M, Mannocci A, Ottolenghi L, Villari P, Polimeni A, et al. The Use of Yoga to Manage  
50 Stress and Burnout in Healthcare Workers: A Systematic Review. *Journal of Clinical Medicine*. 2019  
51 Mar;8(3):284.  
52  
53  
54  
55  
56  
57  
58  
59  
60

- How would you describe your social life now that social distancing measures have been brought in because of Covid-19?
- In what ways has your work life been impacted by the Covid-19 pandemic?
- How do you feel about the changes that have been brought about by Covid-19? Have they had any impact on your mental health or wellbeing?
- Have there been any positive experiences for you resulting from the Covid-19 pandemic?

Figure 1: Examples of Questions in the Topic Guide



|                                 |                          |                                                                                                                                                                                                                   |
|---------------------------------|--------------------------|-------------------------------------------------------------------------------------------------------------------------------------------------------------------------------------------------------------------|
| 1<br>2<br>3<br>4<br>5<br>6<br>7 | Communication challenges | <ul style="list-style-type: none"><li>•Virtual consulting</li><li>•Difficult conversations</li></ul>                                                                                                              |
| 8<br>9<br>10<br>11<br>12        | Work-related stressors   | <ul style="list-style-type: none"><li>•Need to protect loved ones</li><li>•Public not following rules</li><li>•Increased workload and changing work conditions</li><li>•Uncertainty of risk to patients</li></ul> |
| 13<br>14<br>15<br>16<br>17      | Support structures       | <ul style="list-style-type: none"><li>•Team unity</li><li>•Leadership</li><li>•Social support</li></ul>                                                                                                           |
| 18<br>19<br>20<br>21<br>22      | Resilience               | <ul style="list-style-type: none"><li>•Proactive coping</li><li>•Accepting uncertainty</li><li>•Increased sense of purpose and reward</li></ul>                                                                   |
| 23<br>24<br>25<br>26<br>27      | Personal growth          | <ul style="list-style-type: none"><li>•Slowing down</li><li>•Increased reflection</li><li>•Improved non-work relationships</li></ul>                                                                              |

Figure 2: Themes and sub-themes

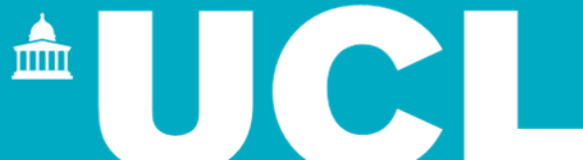

## Draft topic guide: Health and Care Workers

### Ask to describe 'normal life' – before the crisis, and now

- Employed? Type of job, hours etc,
- Full time parent or carer?
- Who you normally live with, does this change, separated/ extended family?
- Whether you would usually have done any type(s) of regular exercise (whatever they perceive as exercise including walking/gardening)

## SOCIAL LIFE

### What was your social life before the Covid-19 pandemic? Has this changed? If so, what has been the impact of Covid-19 on your social life?

- How would you describe your social network before Covid – for example size, types of people, types of relationships, do they live with you, nearby or further away, how often do you see each other, how well do you know each other? How do you interact, face to face, online or social media? Describe some of your common socialising activities. **Has this changed? What has the impact of Covid been on your social network?**
- Can you tell us about any ways your social networks/ friendship groups influence you, such as peer pressure, or encouraging you to get involved in things? Do you compare your life to theirs?
- Could you describe any community participation or volunteering participation before Covid? **Has this changed? If so, what has been the impact of Covid-19 on community participation/volunteering participation?**
- Could you describe the social support you have before Covid? (such as emotional support, advice and information, someone to help you with money or milk/bread/essentials) **Has this changed? If so, what has been the impact of Covid-19 on your social support?**
- **Social engagement (social roles, bonding, attachment) (pre- and post- Covid)**

## WORK LIFE

### How would you describe your work life before the Covid-19 pandemic?

Prompts include:

- Describe a typical day?
- Describe your work environment prior to the crisis
- How much autonomy did you have in your role?
- Did you find your job rewarding?
- Did you feel able to do your job to a high standard?
- Did you enjoy your job?
- Describe your sense, if any, of team unity or disunity prior to this crisis?
- How able were you to follow organisational rules and how did you feel about this?
- Normally did you feel safe at work? In what way?

### How would you describe your work life since the Covid-19 pandemic? Please tell us about this

- Describe a typical day now – how have common work practices changed? Have you adapted your work in response to Covid-19 (e.g. delivery, operating hours, change of products/production methods)
- Describe your overall work environment now
- How much autonomy do you feel you have at the moment and how has this changed?
- Are you finding work rewarding at the moment?
- Do you feel able to do your job to a high standard – has this changed since the crisis?
- Enjoyment – do you currently enjoy your job?
- Describe your sense, if any, of team unity or disunity during this crisis?
- How able are you to follow organisational rules and how do you feel about this?
- Do you feel safe? If this has changed, how?

## MENTAL HEALTH

### How do you feel about the changes that have been brought about by Covid-19?

#### Have they had any impact on your mental health or wellbeing? Please tell us about these

- What are the things most bothering you at the moment (work or outside of work)?
- What have been the major triggers/causes of any mental health or wellbeing issues?
- How have government guidelines or organisational guidelines impacted your mental health or wellbeing?
- Have you experienced any impact on positive emotions? (prompts: how deeply you can engage with what you are doing, sense of meaning/ purpose, relationships with others, how well you are managing and feelings of control over your situation?)
- Has there been any impact on your sense of identity?
- Have you experienced any negative psychological feelings? (prompts: such as shame, guilt, lack of pleasure, anxiety, worry)
- Please tell us about any physical symptoms due to being stressed or anxious? (prompts: fatigue, sleep problems, pain, illness symptoms, palpitations)

#### Have you been doing/ planning anything to help with this?

- How has your support been, from friends/family? From work colleagues/your organisation?
- Connecting with family or friends online
- Online groups?
- Hobbies/ Reading
- Exercise at home <ask about what they have been doing and if there are specific resources they have found useful to exercise>
- Volunteering
- Other engagement

#### Why are you doing/ not doing these things?

- Helpful/ not helpful – please tell us why
- Enjoyable
- Good for mental health/ wellbeing
- Can't get online, not connected, not comfortable, affordability, confidence in using/ skills
- Skills in using the internet/ communication software
- Living arrangements/ Work/ caring demands
- Peer support/ pressure
- Difficulties/ restriction in physical environment

## PROSPECTION

1  
2  
3 **Has the pandemic meant that you have any worries for the future?**  
4

- 5
- 6 • Worries about work/the future of your work?
  - 7 • Worries for yourself? Anything not directly connected to work?

8  
9 **How are these different from the worries you had before?**

- 10
- 11 • Sense of control/ powerlessness
  - 12 • Severity of worries / perspective

13 **Will this change the way you live your life in future?**

- 14
- 15 • The way you connect with others
  - 16 • How you look after yourself
  - 17 • How you support others
  - 18 • How you exercise?

19 Do you think there will be any changes to the way you work in the future? Why/why not?

20  
21 Has this changed any of your priorities for the future?  
22  
23  
24  
25  
26  
27  
28  
29  
30  
31  
32  
33  
34  
35  
36  
37  
38  
39  
40  
41  
42  
43  
44  
45  
46  
47  
48  
49  
50  
51  
52  
53  
54  
55  
56  
57  
58  
59  
60

## COREQ (CONsolidated criteria for REporting Qualitative research) Checklist

A checklist of items that should be included in reports of qualitative research. You must report the page number in your manuscript where you consider each of the items listed in this checklist. If you have not included this information, either revise your manuscript accordingly before submitting or note N/A.

| Topic                                          | Item No. | Guide Questions/Description                                                                                                                              | Reported on Page No. |
|------------------------------------------------|----------|----------------------------------------------------------------------------------------------------------------------------------------------------------|----------------------|
| <b>Domain 1: Research team and reflexivity</b> |          |                                                                                                                                                          |                      |
| <i>Personal characteristics</i>                |          |                                                                                                                                                          |                      |
| Interviewer/facilitator                        | 1        | Which author/s conducted the interview or focus group?                                                                                                   |                      |
| Credentials                                    | 2        | What were the researcher's credentials? E.g. PhD, MD                                                                                                     |                      |
| Occupation                                     | 3        | What was their occupation at the time of the study?                                                                                                      |                      |
| Gender                                         | 4        | Was the researcher male or female?                                                                                                                       |                      |
| Experience and training                        | 5        | What experience or training did the researcher have?                                                                                                     |                      |
| <i>Relationship with participants</i>          |          |                                                                                                                                                          |                      |
| Relationship established                       | 6        | Was a relationship established prior to study commencement?                                                                                              |                      |
| Participant knowledge of the interviewer       | 7        | What did the participants know about the researcher? e.g. personal goals, reasons for doing the research                                                 |                      |
| Interviewer characteristics                    | 8        | What characteristics were reported about the interviewer/facilitator? e.g. Bias, assumptions, reasons and interests in the research topic                |                      |
| <b>Domain 2: Study design</b>                  |          |                                                                                                                                                          |                      |
| <i>Theoretical framework</i>                   |          |                                                                                                                                                          |                      |
| Methodological orientation and Theory          | 9        | What methodological orientation was stated to underpin the study? e.g. grounded theory, discourse analysis, ethnography, phenomenology, content analysis |                      |
| <i>Participant selection</i>                   |          |                                                                                                                                                          |                      |
| Sampling                                       | 10       | How were participants selected? e.g. purposive, convenience, consecutive, snowball                                                                       |                      |
| Method of approach                             | 11       | How were participants approached? e.g. face-to-face, telephone, mail, email                                                                              |                      |
| Sample size                                    | 12       | How many participants were in the study?                                                                                                                 |                      |
| Non-participation                              | 13       | How many people refused to participate or dropped out? Reasons?                                                                                          |                      |
| <i>Setting</i>                                 |          |                                                                                                                                                          |                      |
| Setting of data collection                     | 14       | Where was the data collected? e.g. home, clinic, workplace                                                                                               |                      |
| Presence of non-participants                   | 15       | Was anyone else present besides the participants and researchers?                                                                                        |                      |
| Description of sample                          | 16       | What are the important characteristics of the sample? e.g. demographic data, date                                                                        |                      |
| <i>Data collection</i>                         |          |                                                                                                                                                          |                      |
| Interview guide                                | 17       | Were questions, prompts, guides provided by the authors? Was it pilot tested?                                                                            |                      |
| Repeat interviews                              | 18       | Were repeat interviews carried out? If yes, how many?                                                                                                    |                      |
| Audio/visual recording                         | 19       | Did the research use audio or visual recording to collect the data?                                                                                      |                      |
| Field notes                                    | 20       | Were field notes made during and/or after the interview or focus group?                                                                                  |                      |
| Duration                                       | 21       | What was the duration of the interviews or focus group?                                                                                                  |                      |
| Data saturation                                | 22       | Was data saturation discussed?                                                                                                                           |                      |
| Transcripts returned                           | 23       | Were transcripts returned to participants for comment and/or                                                                                             |                      |

| Topic                                  | Item No. | Guide Questions/Description                                                                                                        | Reported on Page No. |
|----------------------------------------|----------|------------------------------------------------------------------------------------------------------------------------------------|----------------------|
|                                        |          | correction?                                                                                                                        |                      |
| <b>Domain 3: analysis and findings</b> |          |                                                                                                                                    |                      |
| <i>Data analysis</i>                   |          |                                                                                                                                    |                      |
| Number of data coders                  | 24       | How many data coders coded the data?                                                                                               |                      |
| Description of the coding tree         | 25       | Did authors provide a description of the coding tree?                                                                              |                      |
| Derivation of themes                   | 26       | Were themes identified in advance or derived from the data?                                                                        |                      |
| Software                               | 27       | What software, if applicable, was used to manage the data?                                                                         |                      |
| Participant checking                   | 28       | Did participants provide feedback on the findings?                                                                                 |                      |
| <i>Reporting</i>                       |          |                                                                                                                                    |                      |
| Quotations presented                   | 29       | Were participant quotations presented to illustrate the themes/findings?<br>Was each quotation identified? e.g. participant number |                      |
| Data and findings consistent           | 30       | Was there consistency between the data presented and the findings?                                                                 |                      |
| Clarity of major themes                | 31       | Were major themes clearly presented in the findings?                                                                               |                      |
| Clarity of minor themes                | 32       | Is there a description of diverse cases or discussion of minor themes?                                                             |                      |

Developed from: Tong A, Sainsbury P, Craig J. Consolidated criteria for reporting qualitative research (COREQ): a 32-item checklist for interviews and focus groups. *International Journal for Quality in Health Care*. 2007. Volume 19, Number 6: pp. 349 – 357

**Once you have completed this checklist, please save a copy and upload it as part of your submission. DO NOT include this checklist as part of the main manuscript document. It must be uploaded as a separate file.**

# BMJ Open

## The psychosocial impact on frontline health and social care professionals in the UK during the COVID-19 pandemic: a qualitative interview study.

|                                 |                                                                                                                                                                                                                                                                                                                                                                                                                                                                                                                                                                                             |
|---------------------------------|---------------------------------------------------------------------------------------------------------------------------------------------------------------------------------------------------------------------------------------------------------------------------------------------------------------------------------------------------------------------------------------------------------------------------------------------------------------------------------------------------------------------------------------------------------------------------------------------|
| Journal:                        | <i>BMJ Open</i>                                                                                                                                                                                                                                                                                                                                                                                                                                                                                                                                                                             |
| Manuscript ID                   | bmjopen-2020-047353.R1                                                                                                                                                                                                                                                                                                                                                                                                                                                                                                                                                                      |
| Article Type:                   | Original research                                                                                                                                                                                                                                                                                                                                                                                                                                                                                                                                                                           |
| Date Submitted by the Author:   | 14-Jan-2021                                                                                                                                                                                                                                                                                                                                                                                                                                                                                                                                                                                 |
| Complete List of Authors:       | Aughterson, Henry; University College London Research Department of Epidemiology and Public Health, Behavioural science and health<br>McKinlay, Alison; University College London Research Department of Epidemiology and Public Health, Department of Behavioural Science and Health<br>Fancourt, Daisy; University College London Research Department of Epidemiology and Public Health, Department of Behavioural Science and Health<br>Burton, Alexandra; University College London Research Department of Epidemiology and Public Health, Department of Behavioural Science and Health |
| <b>Primary Subject Heading</b>: | Qualitative research                                                                                                                                                                                                                                                                                                                                                                                                                                                                                                                                                                        |
| Secondary Subject Heading:      | Epidemiology, Health policy, Mental health, Public health, Sociology                                                                                                                                                                                                                                                                                                                                                                                                                                                                                                                        |
| Keywords:                       | MENTAL HEALTH, COVID-19, QUALITATIVE RESEARCH, Health policy < HEALTH SERVICES ADMINISTRATION & MANAGEMENT, MEDICAL EDUCATION & TRAINING, PUBLIC HEALTH                                                                                                                                                                                                                                                                                                                                                                                                                                     |
|                                 |                                                                                                                                                                                                                                                                                                                                                                                                                                                                                                                                                                                             |

SCHOLARONE™  
Manuscripts



I, the Submitting Author has the right to grant and does grant on behalf of all authors of the Work (as defined in the below author licence), an exclusive licence and/or a non-exclusive licence for contributions from authors who are: i) UK Crown employees; ii) where BMJ has agreed a CC-BY licence shall apply, and/or iii) in accordance with the terms applicable for US Federal Government officers or employees acting as part of their official duties; on a worldwide, perpetual, irrevocable, royalty-free basis to BMJ Publishing Group Ltd ("BMJ") its licensees and where the relevant Journal is co-owned by BMJ to the co-owners of the Journal, to publish the Work in this journal and any other BMJ products and to exploit all rights, as set out in our [licence](#).

The Submitting Author accepts and understands that any supply made under these terms is made by BMJ to the Submitting Author unless you are acting as an employee on behalf of your employer or a postgraduate student of an affiliated institution which is paying any applicable article publishing charge ("APC") for Open Access articles. Where the Submitting Author wishes to make the Work available on an Open Access basis (and intends to pay the relevant APC), the terms of reuse of such Open Access shall be governed by a Creative Commons licence – details of these licences and which [Creative Commons](#) licence will apply to this Work are set out in our licence referred to above.

Other than as permitted in any relevant BMJ Author's Self Archiving Policies, I confirm this Work has not been accepted for publication elsewhere, is not being considered for publication elsewhere and does not duplicate material already published. I confirm all authors consent to publication of this Work and authorise the granting of this licence.



# The psychosocial impact on frontline health and social care professionals in the UK during the COVID-19 pandemic: a qualitative interview study.

Henry Aughterson<sup>1</sup>, Alison McKinlay<sup>1</sup>, Daisy Fancourt<sup>1</sup>, Alexandra Burton<sup>1</sup>

1. University College London Research Department of Epidemiology and Public Health, Behavioural science and health  
London, UK

Correspondence to Henry Aughterson [henry.aughterson.14@ucl.ac.uk](mailto:henry.aughterson.14@ucl.ac.uk) 07534241106 1-19 Torrington Place  
WC1E 7HB

## Abstract

**Objectives** To explore the psychosocial well-being of health and social care professionals working during the COVID-19 pandemic.

**Design** This was a qualitative study deploying in-depth, individual interviews, which were audio-recorded and transcribed verbatim. Thematic analysis was used for coding.

**Participants** This study involved 25 participants from a range of frontline professions in health and social care.

**Setting** Interviews were conducted over the phone or video call, depending on participant preference.

**Results** From the analysis, we identified 5 overarching themes: communication challenges, work-related stressors, support structures, personal growth, and individual resilience. The participants expressed difficulties such as communication challenges and changing work conditions, but also positive factors such as increased team unity at work, and a greater reflection on what matters in life.

**Conclusions** This study provides evidence on the support needs of health and social care professionals amid continued and future disruptions caused by the pandemic. It also elucidates some of the successful strategies (such as mindfulness, hobbies, restricting news intake, virtual socialising activities) deployed by health and social care professionals that can support their resilience and well-being and be used to guide future interventions.

**Keywords** COVID-19 pandemic, mental health, resilience, coping strategies, healthcare workers, carers, social workers, qualitative research, UK

## Strengths and limitations of this study

- This is the first known study in the UK to interview both health and social care professionals working in a range of settings on their experiences working through COVID-19.

- This study used a strong theoretical approach to inform the topic guide, and one-to-one interviews allowed in-depth analysis of the psychosocial experiences of health and social care professionals, complementing the wider availability of quantitative evidence.
- We interviewed a wide range of professions, which provided breadth of experience but might limit the specificity of findings.
- Given the fluctuating nature of the pandemic, attitudes of health and social care professionals may change over time. This can be challenging to capture during a single interview, however we did ask questions on how their experience had progressed longitudinally.
- Our sample may have been biased towards people who had more free time to participate and so were coping better than others. However, our sample still described a number of stressful experiences during the pandemic, and it is also possible that workers who were frustrated or stressed wished to express their views.

## Introduction

To control the spread of the COVID-19 pandemic, epidemiological measures were taken across the globe, with responses differing between nations depending on their own public health circumstances, scientific advice and political priorities (1). In the UK, from March 23<sup>rd</sup> this involved a national 'lockdown', involving significant restrictions on citizens' way of life including measures such as 'staying at home', social distancing and the closure of workplaces, shops and other services (2). Specific lockdown measures were eased over time, but major constraints and the progressive tightening and relaxing of such restraints remained for substantial periods.

Some professions, known as 'key workers', considered to provide an essential service to the public, were excluded from various restrictions and continued working throughout the pandemic. Crucially, health and social care professionals were designated as key workers to enable their continued support for patients and clients throughout the UK's National Health Service (NHS) and social care system. When measures were first announced, significant concerns arose around lack of capacity within the NHS, limited personal protective equipment (PPE) and staff burnout (3). Previous research exploring the psychological impact on health and care professionals during epidemics such as SARS (Severe Acute Respiratory syndrome) and MERS (Middle East Respiratory Syndrome), has highlighted the adverse psychological effects that frontline health work during epidemics can have (4–6). There is also emerging evidence during the COVID-19 pandemic that healthcare workers experienced heightened levels of stress and anxiety (7–11), depression (8,9,12) and poor sleep quality (8,13).

There are a number of reasons why health and care workers can experience adverse psychological consequences in epidemics. First, rising cases of a new infection can lead to longer hours, more intense working environments, and work-life imbalance, which disrupt the equilibrium between work demands and

1  
2  
3 workers' response capacity (14). This, coupled with a lack of control, unclear job expectations, and lack of  
4 social support at work are the components of 'professional burn-out' (15). Concerns about the mental health  
5 and wellbeing of health and social care professionals in the UK were growing prior to the Covid-19 pandemic,  
6 with 'professional burnout' recognised as a particular challenge (15,16). Moreover, there is evidence one may  
7 feel they lack the tools to manage ('loss of manageability') the confusion created by diagnosing and treating an  
8 unknown infection ('loss of comprehensibility') and experience a reduction of work to essential rather than  
9 meaningful patient interactions ('loss of meaningfulness') which combined may disrupt their 'sense of  
10 coherence' (SOC) (a measure of resilience – how effectively one is able to cope with stressors) (17,6,18,19).  
11 This disruption has been found to adversely affect mental health (the SOC theory informed part of our  
12 interview guide; See 'Methods') (20). However, equally there is evidence demonstrating that health and care  
13 workers have moderate to high levels of psychological resilience during times of pandemics (21), and so it is  
14 unclear whether or not they will have a robust, or disrupted, sense of coherence during COVID. Third, staff  
15 may be concerned about their own risks from exposure to a new pathogen, or the risks that they might infect  
16 family or friends. These concerns can be particularly acute when the aetiology and outcomes from a new virus  
17 are not well understood (6).

26  
27  
28 There are few published qualitative studies that have investigated the psychosocial impact of the COVID-19  
29 pandemic on both health and social care professionals within the UK. One qualitative study interviewing 30  
30 hospital-based healthcare workers in the UK found heightened anxiety related to PPE issues and lack of  
31 training in new skills (17), while another study with nurses and support workers in care settings identified a  
32 lack of pandemic preparedness, heightened anxiety, shortage of PPE and ever-changing PPE guidance (22). It is  
33 unclear what the psychosocial challenges faced by other health and care workers are – such as GPs, mental  
34 health and social workers. Moreover, current research on health and care workers during COVID-19 has  
35 predominantly been quantitative, using pre-assumed hypotheses of negative effects. However, in previous  
36 pandemics such as SARS and MERS, there were some positive outcomes including a more positive outlook  
37 towards work, growth under pressure, greater comradery with colleagues, and a strong sense of professional  
38 responsibility and personal development (5,6). A UK study interviewing hospital-based healthcare workers  
39 during COVID-19 also found increased solidarity between colleagues and high levels of morale (17).

46  
47  
48 There is a need for qualitative research to explore factors that have helped to alleviate distress and build  
49 resilience amongst health and social care workers during the pandemic. This is crucial in order to provide  
50 richer data of their experiences to aid our understanding of specific stressors, guide future support and  
51 interventions both as COVID-19 continues, and also in the occasion of future pandemics and stressful  
52 situations within the NHS. There may be common factors that contribute towards individuals' resilience during  
53 this period which may provide useful learning for employers and employees in order to better harness or  
54 encourage such factors. Therefore, the aims of this study were to explore: (1) The impact of the COVID-19  
55 pandemic overall on the working lives and mental health of health and social care professionals, and (2) the  
56  
57  
58  
59  
60

1  
2  
3 factors that help alleviate distress and contribute to the resilience of health and social care professionals  
4 during the pandemic.  
5  
6  
7

## 8 **Methods**

### 9 Sample and recruitment:

10 We recruited health and social care professionals from across the UK using social media, personal contacts,  
11 newsletters and from a sample of participants taking part in a large, nationwide, quantitative survey study: the  
12 UCL COVID-19 Social Study (23). This research forms a qualitative component of this larger study. 25  
13 participants, from a range of frontline professions within health and social care, were recruited and  
14 interviewed between May 1<sup>st</sup> and September 17<sup>th</sup> (Table 1). Sampling was purposive to include a range of ages,  
15 ethnicity, gender and professional roles. Interviews ceased when data sufficiency was reached and the lead  
16 author identified no new themes. Presentation of recruitment, data collection and analysis are aligned with  
17 the COREQ criteria for reporting qualitative research (24).  
18  
19  
20  
21  
22  
23  
24

### 25 Data collection:

26 Semi-structured, one-to-one, telephone or video interviews were conducted by HA (PhD student and trainee  
27 medic) and AB (mental health services researcher) exploring the impact of the pandemic on participants' social  
28 lives, work life, and mental health. The interviews lasted an average of 51 minutes (range 29-93). Berkman's  
29 social networks framework and Antonovsky's sense of coherence (SOC) theory informed the topic guide  
30 questions on social life and mental health, respectively – e.g. including questions on social networks, social  
31 roles and meaning/purpose that related to each theory (25,20). The full Topic Guide is provided in  
32 Supplementary Material and exemplary questions are provided in Figure 1. All participants were given a  
33 Participant Information Sheet and encouraged to ask questions. Written informed consent was then obtained  
34 and a demographics form completed by all participants. We audio-recorded interviews with participants'  
35 consent, and recordings were transcribed by a professional transcription service. The audio recording of  
36 interviews and available transcripts enabled the repeating revisiting of data in order to remain true to  
37 participants' original accounts, helping to enhance validity of the results.  
38  
39  
40  
41  
42  
43  
44  
45

46 **[Figure 1 to go ~ here]**  
47  
48

49 Figure 1: Examples of Questions in the Topic Guide  
50  
51

## 52 **Patient and public involvement**

53 The study participants or public were not involved in the design of the study, the conduct of the study, the  
54 writing of the paper nor in the dissemination of the study results. However, participants will be sent study  
55 results if requested, and the findings will be shared with the wider public through newsletters (the MARCH  
56 network) and social media.  
57  
58  
59  
60

### Data analysis:

The analytical approach deployed was reflexive thematic analysis (26). This followed the steps described by Braun and Clarke (27) of familiarisation with the data, generation and definition of codes, theme searching, and producing the report. HA and AM (research psychologist) independently coded four transcripts, which were discussed before HA coded and interpreted all remaining transcripts, continuing until data sufficiency was reached and no new codes identified. A deductive approach was used to develop the initial coding framework based on concepts in the topic guide, followed by an inductive coding approach (where new themes were generated from our data) as new concepts were added to the framework based on the data. Contradictory data and context around codes was retained, to capture subtle nuances. Codes were then grouped into themes, with each theme representing a meaningful pattern in the data. All final themes were agreed by study authors. We have included rich and verbatim descriptions of participants' accounts in order to support these findings. Weekly team meetings with researchers from the qualitative COVID-19 Social Study team were also utilised to discuss and develop findings. This method helped to reduce individual-level research bias that may have affected the interpretation of results, thus enhancing validity of the findings. The software utilised for coding was NVivo qualitative data analysis, Version 12 (28).

## Results

We interviewed 25 participants, from a range of professions within health and social care including doctors, nurses, carers and social workers working in hospital, residential, community and primary care settings. Participants were aged 26-65, predominantly female (80%) and White British (68%).

Table 1: Characteristics of the health and social care professionals

|                        |                                                                                                                                                                                                                                                                  |
|------------------------|------------------------------------------------------------------------------------------------------------------------------------------------------------------------------------------------------------------------------------------------------------------|
| Number of participants | 25                                                                                                                                                                                                                                                               |
| Profession             | Hospital doctor (6)<br>GP (4)<br>Hospital nurse (3)<br>Social worker (3)<br>Home carer (2)<br>Care home carer (2)<br>Assistant psychologist (1)<br>Community nurse (1)<br>Practice nurse (1)<br>Counsellor & psychotherapist (1)<br>Academic physiotherapist (1) |
| Age                    | Range 26-65                                                                                                                                                                                                                                                      |

|           |                                                                                                     |
|-----------|-----------------------------------------------------------------------------------------------------|
| Gender    | Male 5<br>Female 20                                                                                 |
| Ethnicity | White British 17<br>Asian 3<br>Black British 2<br>White & Asian 1<br>White Irish 1<br>White Other 1 |

#### Themes:

5 primary themes were identified. These were: **Communication challenges**, **Work-related stressors**, **Support structures**, **Resilience**, and **Personal growth**. Themes and corresponding sub-themes are displayed in Figure 2.

[Figure 2 to go ~ here]

Figure 2: Themes and sub-themes

### Communication challenges

The pandemic brought with it numerous challenges around communication for health and social care professionals in their work. One of these was associated with new virtual means of consulting, and the other with the greater levels of difficult conversations.

#### Virtual consulting

Some consultations had shifted online, especially among GPs, therapists and social workers. Several participants said that one of the key benefits was the increased efficiency of virtual communication and consultations.

“Much more is done remotely, which is just so much more efficient, because patients don’t always need to be seen face to face. Patients preferred it, we preferred it.” (Participant\_16\_GP)

However, more often participants talked about the limitations of virtual consultations. Participants found it difficult to provide appropriate emotional support, especially in a time where there was heightened need. This was more commonly an issue for social care, mental health and palliative care professionals supporting vulnerable adults or children.

1  
2  
3  
4  
5 “It makes me realise the importance of seeing someone face to face to actually support them. I just don’t think  
6 a telephone call or a Zoom call is sufficient when it comes to helping people who have profound mental health  
7 issues, or even mild mental health issues. And I think that some people just need the power of touch or a hug  
8 or a face-to-face human person to ensure that they’re kept safe and okay” (Participant\_4\_Hospital  
9 doctor\_palliative\_care\_registrar)  
10  
11  
12

13  
14 Participants often found it difficult to build new relationships virtually, especially when working with children:  
15

16  
17 “I think if you already know someone well, and you are speaking to them on video call, then that’s fine  
18 because you’ve already established the relationship... but if you have to start establishing the relationship on a  
19 video call...there is something missing I think, especially working with children... especially if you have a child  
20 that’s introverted or struggles to communicate or has learning difficulties or is very shy. It’s harder to make  
21 them feel comfortable when you’re on video call” (Participant\_10\_social\_worker)  
22  
23  
24

25  
26 Participants talked about difficulties identifying crucial signs of deterioration in health from patients or clients,  
27 e.g. from body language:  
28

29  
30  
31 “We have to be able to pick up signs, for instance, if they are suicidal, I think there’s an anxiety there that  
32 doing it online, it’s difficult sometimes to do that, to pick up on some nuances of the way they talk... we can’t  
33 see their whole body language” (Participant\_9\_counsellor&psychotherapist)  
34  
35

36  
37 Participants, especially mental health and social workers, reported difficulty ensuring a confidential space  
38 when consulting virtually:  
39

40  
41 “When they’re (children) talking to you, perhaps you see them in a room and it seems like they’re alone. But  
42 actually, maybe they have all their family members that are standing in the corner”  
43 (Participant\_10\_social\_worker)  
44  
45  
46

### 47 **Difficult conversations**

48 A common challenge during this period was an increase in difficult conversations with patients, clients and  
49 their family members. The need for PPE, and virtual consultations, accentuated these difficulties. This was  
50 especially apparent in those working in services that provide mental health and palliative care.  
51  
52

53  
54  
55 “Family communication is awful these days... You can’t see someone, and you’re speaking to them on the  
56 phone, and you’re telling them that they can’t come and see their loved one, and that their loved one might  
57 well die, that’s an awful conversation to have with someone...it’s definitely one of the worst things about  
58 COVID for me” (Participant\_8\_Hospital\_doctor)  
59  
60

1  
2  
3  
4  
5 Several participants said they were providing more emotional support to patients and clients than usual:  
6  
7

8 “There’s been a huge amount of emotional support that we’ve had to give through anxiety, through grief. All  
9 that has been heightened quite greatly really. And a deeper sense of sadness in yourself, that you’re trying to  
10 support people and having that empathy for them, thinking this is just absolutely horrendous for them”  
11

12 (Participant\_20\_Home\_carer)  
13  
14

## 15 16 **Work-related stressors**

17  
18 Health and social care professionals said that they experienced a range of challenging emotions and  
19 psychological difficulties. This included frustration at members of public not following social distancing rules,  
20 the concern about protecting their loved ones from infection, and increased workload and changing working  
21 conditions.  
22  
23

### 24 25 26 **Public not following the rules**

27 Participants said that they felt frustrated with members of the public not following social distancing and other  
28 guidelines, feeling that their work on the frontline was being undermined.  
29

30  
31 “I’ve been quite annoyed... you’re trying your best in lockdown to obey the government guidelines and I think  
32 I’ve had a huge amount of frustration by hearing and seeing people who haven’t...certain politicians as well  
33 that haven’t stuck to guidelines, and I feel sometimes I’ve been working my socks off and felt quite cheated”  
34

35 (Participant\_20\_Home\_carer&nurse)  
36  
37

38  
39 “I didn’t see my boyfriend for six months. I just did not want to leave my house because of how I feared and  
40 felt that other people were behaving... just seeing people not following the rules”  
41

42 (Participant\_24\_Assistant\_psychologist)  
43  
44

### 45 46 **The need to protect loved ones**

47 Nearly all participants spoke about ongoing worry for friends and family compounded by a fear of transmitting  
48 the virus to them – due to participants’ increased risk of catching it at work. Participants reported taking extra  
49 measures in order to protect their loved ones.  
50

51  
52  
53 “Normally I would see my mum every day... but where I work, I was worried, I was more at risk to catch  
54 anything, so I definitely didn’t. My sisters were actually going into the garden, and talking to her... but I  
55 wouldn’t, so I was standing at the gate. So that was pretty hard, because I’m very close to my mum”  
56

57 (Participant\_21\_Care\_home\_manager&carer)  
58  
59  
60



1  
2  
3 “It would be super lovely to have a giant hug from my dad, but I know that’s not possible... in the line of work  
4 that I do, the risk to him would just be immense because I have been on the COVID wards”

5  
6 (Participant\_4\_Hospital\_doctor\_palliative\_care\_registrar)  
7  
8

### 9 10 **Increased workload and changing work conditions**

11 Fatigue and exhaustion were commonly reported by participants throughout this period.  
12

13  
14 “I’m just feeling really run down... I literally have 4 or 5 weeks where I’ve not left the house unless it’s just to  
15 pop to the supermarket... I find that really does impact me... it’s like work has taken over my whole life and I’m  
16 exhausted” (Participant\_11\_Family\_support\_worker)  
17

18  
19  
20 Whilst not unanimous, some participants said that they were working longer hours and had an increased  
21 workload.  
22

23  
24 “My routine was really like... wake up, eat something, go into work, which as shifts as nurses we had to stay in  
25 the hospital for 12 and a half hours...go home and eat something, drink something, go to sleep... then wake up  
26 and then go to work again... we have been extremely busy compared to the normality”  
27

28  
29 (Participant\_19\_Hospital\_nurse)  
30

31  
32 Feelings of fatigue were also enhanced by the tenuous nature of PPE:  
33

34  
35 “you just become quite tired...it culminated with masks, visors, aprons, hot weather and regulations changing  
36 and sometimes you’d come home from a shift and feel you’d been pulled in all directions really”  
37

38  
39 (Participant\_20\_Home\_carer&nurse)  
40

41  
42 Moreover, a common concern for participants was making decisions that balanced the complex, and often  
43 unknown, risks associated with the virus along with other health risks. This was particularly difficult during the  
44 early phases of the pandemic, when less was known about the virus.  
45

46  
47 “...sometimes I’ve thought, right, we do need to bring patients in, but then are you putting them at more risk  
48 exposing them to the virus, which could actually kill them, and actually they could potentially just have a  
49 gastro bug and not bowel cancer?” (Participant\_16\_GP)  
50  
51

### 52 53 **Support structures**

54  
55 The availability of support structures at work and home was identified as an important buffer for the  
56 psychosocial impact of working during the pandemic and in coping with considerable work-related changes.  
57  
58  
59  
60

1  
2  
3 Themes associated with this feeling of being supported included team unity and leadership at work, and wider  
4 social support.  
5  
6  
7

### 8 Team unity:

9 Participants often felt they were closer to their team, and that team unity had increased during the pandemic,  
10 united over a common cause. This was more likely if teams were cohesive before the pandemic, and was  
11 particularly apparent for doctors in primary and secondary care.  
12  
13  
14

15  
16  
17 “just having the vibes that we’re all in this together and we’re all going (through) the same thing, and we’re  
18 pulling in the same direction” (Participant\_3\_Hospital\_doctor\_intensive\_care)  
19

20  
21 Some of this unity was facilitated through virtual communication:  
22

23  
24 “We actually started up a group, ourselves, on WhatsApp. It’s just our team, it doesn’t include management.  
25 It’s just for family support workers and social workers... we try not to put work stuff on there... we try to send  
26 each other funny messages or memes... to keep us going” (Participant\_11\_family\_support\_worker)  
27  
28

29  
30 Participants felt the increase in virtual meetings improved attendance, due to the ease of just being able to  
31 “dial in” and improved collaborative working among multidisciplinary teams.  
32  
33

34  
35 “When we’re safeguarding a child, you are supposed to work collaboratively... it’ll be social care and school,  
36 health, maybe a youth organisation or domestic abuse organisation... when you’re doing these physical  
37 meetings, beforehand, people just wouldn’t turn up... but now, they can just dial in”  
38 (Participant\_23\_Social\_worker)  
39  
40

41  
42 However, team unity was not unanimous, with several participants experiencing loneliness, due to an increase  
43 in lone working or working from home.  
44  
45

46  
47 “I was then at home isolating for two weeks, and so I was working from home. I had remote access to my  
48 computer, so I was doing purely telephone consultations from home and I felt very isolated there, and I didn’t  
49 feel like I was part of the team at all” (Participant\_13\_GP)  
50  
51

52  
53 A few participants also described difficulties connecting with colleagues virtually for support:  
54

55  
56 “I think it could have been improved by seeing each other face-to-face, and I have to say that has been really  
57 detrimental to our team. I think you lose a lot by not seeing someone face to face, in terms of their body  
58  
59  
60

1  
2  
3 language and non-verbal cues aren't always captured particularly well through IT"

4 (Participant\_4\_Hospital\_doctor\_palliative\_care\_registrar)  
5  
6  
7

## 8 Leadership

9

10 Participants expressed frustration about government handling and changing advice throughout the pandemic.  
11 In particular, participants talked about confusing guidance received from management and government  
12 regarding PPE or distancing procedures at work, as well as the speed in which the guidance changed.  
13  
14  
15

16 "I know they (upper management in NHS) have difficult decisions to make quickly but I sometimes find their  
17 rule making quite vague. A bit like the government, I feel like they're making it up as they go along somewhat.  
18 And it changed every day so you'd log onto your emails and there'd be some new change"  
19

20 (Participant\_15\_community\_mental\_health\_nurse)  
21  
22  
23

24 However, some felt the culture of blame itself was frustrating:  
25  
26

27 "the other thing that annoys me sometimes is that... everyone wants to blame everybody...it's like the blame  
28 game...everybody has to blame Boris... Somebody's responsible. China's responsible... I feel that illnesses and  
29 viruses have been around forever and ever and ever... you can't really be pointing the finger all the time, and I  
30 find it quite depressing" (Participant\_12\_Hospital\_doctor\_critical\_care)  
31  
32  
33

34 Most participants felt supported at work and received regular emotional and practical check-ins from  
35 management. A small number felt ignored by management, which led to feelings of being overwhelmed:  
36  
37  
38

39 "I was quite anxious about being in the office with COVID... I had some colleagues of mine who were able to  
40 work from home... I was told that this wasn't possible... it was business as usual. It was a real sense of  
41 frustration, not feeling that you're being listened to by my manager and just a sense of feeling overwhelmed  
42 and quite helpless about the situation" (Participant\_24\_Assistant\_psychologist)  
43  
44  
45  
46

## 47 Social support

48

49 Most participants had supportive relationships with family, friends and colleagues, which helped contribute to  
50 a sense of resilience among participants.  
51  
52

53 "I've got a good, strong marriage and we're a good partnership, my husband and I, and we've supported each  
54 other through all this... our friends are going through similar things, so I'm able to talk to my friends as well.  
55 I've got a good network of friends, so I'm very lucky." (Participant\_20\_Home\_carer&nurse)  
56  
57  
58  
59  
60

1  
2  
3 They also felt supported by their local community, and the public, e.g. through the ‘Clap for Carers’ movement  
4 where people across the country stood outside their front door once a week to applaud health and care  
5 workers for their contribution:  
6  
7

8  
9 “the Clap for Carers thing, the neighbours would come out and clap, and I found that quite touching... quite  
10 uplifting actually” (Participant\_12\_Hospital\_doctor\_critical\_care)  
11  
12

## 13 14 15 16 Resilience

17  
18 Despite the difficulties and challenges, participants also demonstrated significant psychological resilience. This  
19 was often to do with their proactive coping mechanisms, their ability to ‘accept uncertainty’ and the increased  
20 sense of purpose associated with their work.  
21  
22

### 23 24 Proactive coping

25 Most participants said they used well-developed coping mechanisms to deal with the ever-changing  
26 circumstances, including engaging in hobbies, participating in virtual activities, and maintaining routines.  
27  
28

29  
30 “I do genuinely believe getting out into nature has a really good impact on one’s mental health and it certainly  
31 does on mine...Crafting, doing things, keeping busy...that’s really important for your mental health having that  
32 occupations. I crochet... we paint, we draw, we make jewellery...”  
33  
34

35 (Participant\_15\_Community\_mental\_health\_nurse)  
36  
37

38 Participants discussed the negative impact of constant news coverage on coronavirus and the death count,  
39 and intentionally restricted their news intake as they felt it was unhelpful, even harmful to their mental health:  
40  
41

42 “the virus messes with your head more than it does your body, if you’re not hospitalised. That’s just down to  
43 the media at the end of the day. There’s so much media and so much emphasis on death, not so much on  
44 recovery” (Participant\_7\_Hospital\_nurse)  
45  
46  
47

### 48 49 Accepting uncertainty

50 Most participants had a degree of personal, psychological resilience linked to an acceptance, or ‘letting go’, of  
51 what they had no control over, such as the overall outcome of the pandemic or government restrictions.  
52  
53

54 “I’m generally much less anxious now than I was in January and February. And part of that, I think, is about  
55 thinking a lot more about death and being a lot more accepting about death, and about what you can control  
56 and what’s out of your control” (Participant\_14\_GP)  
57  
58  
59  
60

1  
2  
3 Part of this philosophy seemed to be influenced by their previous experiences, and their profession:  
4  
5

6 “Because of my job, I think I’m aware that we’re not really in control of lots of things in our life... I see that all  
7 the time with patients and people I care for... we don’t have control over everything and we have to have a  
8 level of acceptance for that” (Participant\_15\_community\_mental\_health\_nurse)  
9  
10

### 11 12 **Increased sense of purpose and reward**

13 Participants often expressed gratitude for being able to continue working. This brought with it benefits such as  
14 purpose, daily structure, predictability, a degree of socialising and being ‘in-the-know’ about the virus.  
15

16 Participants also talked about how it felt good to be able to contribute. This was highly rewarding and brought  
17 a heightened sense of purpose.  
18

19  
20  
21 “...some people would view me as not being lucky, because I’m a frontline worker, but that’s my job and that’s  
22 what I’m trained to do, so I don’t view that as unlucky... I have been lucky in the sense that I’ve been able to  
23 keep busy, to keep working, to feel I’m contributing” (Participant\_17\_GP)  
24  
25

26  
27 Guilt occurred when participants weren’t able to contribute as much as they would have liked e.g. they were  
28 told they couldn’t work because they were high-risk, or had to work from home.  
29

30  
31  
32 “I felt incredibly guilty by the fact that I wasn’t helping out on the frontline because I was pregnant. I was just  
33 told I’m not allowed to see any patients, by occupational health, and sent home”  
34 (Participant\_6\_Hospital\_doctor)  
35  
36

### 37 38 **Personal growth**

39  
40 The pandemic also brought with it opportunities for personal growth among participants. This involved  
41 increase self-reflection, the opportunity to ‘slow down’ more outside of work, and a perceived improvement in  
42 non-work relationships.  
43  
44

### 45 46 47 **Increased reflection**

48 Participants reported that they were able to reflect more on “what matters” in their lives. Commonly this was  
49 spending quality time with friends and family and appreciating the small things in life.  
50  
51

52  
53 “one benefit is that actually we quite like a simple life and actually you come to appreciate the very simple  
54 things, which are just being outside, going for a bike ride, having a picnic...just the health and happiness of  
55 your own family is what’s important and everything else, you can generally sort out” (Participant\_17\_GP)  
56  
57  
58  
59  
60

1  
2  
3 “I think that’s one of the positive things that have come out of this whole virus, it that it’s allowing people to  
4 take a lot more time to reflect on themselves...to reflect on what are the things that really matter, what do I  
5 really value in life?” (Participant\_10\_social\_worker)  
6  
7  
8

### 9 10 **Slowing down**

11 Participants discussed how the pandemic had given them a chance to slow down and have more “me-time”  
12 and expressed this was something they wished to take forward beyond the pandemic. This view may seem in  
13 conflict with the increased workload experienced by certain participants, but reflected the changes outside of  
14 work, e.g. having fewer social obligations due to social distancing restrictions.  
15  
16  
17

18 “We have really busy lives generally, and we spend a lot of time rushing around doing lots of stuff, and actually  
19 this time has been quite nice in many ways as a period to kind of slow down a bit and I think just appreciating  
20 each other” (Participant\_1\_Hospital\_doctor)  
21  
22  
23

24 “I think it has definitely made me realise that doing less is better for me in terms of not trying to have a finger  
25 in every single pie. So I hope I will be able to retain that side of it”  
26 (Participant\_4\_Hospital\_doctor\_palliative\_care\_registrar)  
27  
28  
29

### 30 31 **Improved non-work relationships**

32 Whilst not unanimous, participants talked about how some of their relationships with others improved during  
33 the pandemic, especially with family members they lived with, the crisis having brought them closer.  
34  
35

36 “I’ve connected with my family a lot more... I feel really good about spending more time with my  
37 daughter...that’s time that I would never have had with her, so that’s really special”  
38 (Participant\_5\_academic\_respiratory\_physiotherapist)  
39  
40  
41

42 “As a family, I think we’ve definitely become closer... we’ve managed to do some things together which we  
43 normally wouldn’t do” (Participant\_11\_Family\_support\_worker)  
44  
45  
46

### 47 48 **Discussion**

49  
50 This qualitative interview study explored the psychosocial impact of the COVID-19 pandemic on health and  
51 social care professionals in the UK. We identified five key themes shared between professionals’ accounts. The  
52 main difficulties reported were ‘communication challenges’ (consisting of ‘virtual consulting’ and ‘difficult  
53 conversations’) and ‘work-related stressors’ (consisting of ‘need to protect loved ones’, ‘public not following  
54 rules’ and ‘increased workload and changing work conditions’). Three factors appeared to mitigate some of the  
55 psychological distress of the pandemic: ‘support structures’ (consisting of ‘team unity’, ‘leadership’ and ‘social  
56 support’), ‘resilience’ (consisting of ‘proactive coping’, ‘accepting uncertainty’ and ‘increased sense of purpose  
57  
58  
59  
60

1  
2  
3 and reward') and 'personal growth' (consisting of 'slowing down', 'increased reflection' and 'improved  
4 relationships').  
5  
6

7  
8 The themes were drawn from interviews with professionals working in different areas of health and social  
9 care, and some themes were felt more strongly in certain jobs than others. For example, GPs and social  
10 workers enjoyed the efficiency of new virtual consultations, but GPs found it difficult to use with older adults  
11 and those with age-related cognitive decline. Those working with mental health clients, such as  
12 psychotherapists and social workers, experienced digital connectivity issues when communicating with  
13 vulnerable clients, leading to frustrating repetitions and difficulties building a trusting relationship. This  
14 corroborates findings from previous research on barriers to virtual consulting (29). Those working with older  
15 adults, found one of the most challenging elements of the pandemic was having difficult conversations over  
16 the telephone with loved ones of patients who were dying - often having to convey that visiting restrictions  
17 meant they would be unable to say goodbye in person. This is potentially concerning for the well-being of  
18 patients and healthcare professionals, given previous research has highlighted the importance of an  
19 appropriate physical and social setting in breaking bad news, and also the presence of family members (30,31).  
20  
21  
22  
23  
24  
25  
26

27  
28 There were a number of common work-related stressors among participants. One of these was frustration  
29 with members of the public not following the social distancing and hygiene regulations, and with the  
30 government's handling of the pandemic. Some also expressed frustration at the 'culture of blame' that they  
31 felt permeated the media and public discourse, which can be maladaptive and harmful for one's own mental  
32 well-being (32). Emotional and physical fatigue were also common experiences across all professions,  
33 corroborating qualitative studies of health and care workers during COVID-19 and previous pandemics globally  
34 (4,5,33). Many participants were worried about putting their loved ones at risk of catching COVID-19 as  
35 highlighted by previous research (34), however in our study it appears to have been a particular concern  
36 amongst carers and hospital doctors/nurses, perhaps due to their higher level of virus exposure.  
37  
38  
39  
40  
41  
42

43 Most participants reported an increased sense of team unity; that they were 'all in this together' fighting a  
44 common enemy. This may have led to a degree of resilience against some of the stressful elements of working  
45 in a pandemic, supporting findings from previous pandemics (5,10). Moreover, supporting Berkman's social  
46 networks theory (35) which informed part of our interview guide, strong social relationships were frequently  
47 cited by participants as key supportive mechanisms for their mental health during this period, including  
48 supportive partners at home, friends, family and colleagues. Those participants that did experience loneliness  
49 at work during the pandemic were lone workers, working from home, or described unsupportive  
50 management. In line with our findings, a recent systematic review of quantitative studies examining the  
51 impact of COVID-19 on healthcare workers found social support to be a vital resource underlying their ability  
52 to cope (21).  
53  
54  
55  
56  
57  
58  
59  
60

1  
2  
3 Participants also described using their own internal resilience as a way to buffer many of the key stressors  
4 involved in working through the pandemic, and even thrive at times. They adopted proactive coping  
5 mechanisms, as seen in healthcare workers during SARS (36). These often involved partaking in activities that  
6 now have substantial evidence for their role in improving mental health including: exercise (37), arts and crafts  
7 (38), spending time in nature (39,40), virtual activities with friends, and maintaining a healthy routine (41,42).  
8 Consistent with research from previous pandemics and recent quantitative data during COVID-19, participants  
9 also restricted their news intake, particularly as they felt the constant reporting of COVID-19 and the prevalent  
10 discourse of blame negatively impacted their mental health (6,23).  
11  
12  
13  
14  
15  
16

17 Most participants said they were successfully able to 'let go' of aspects of the pandemic that they felt were out  
18 of their control, such as the overall course of the virus and government restrictions. This demonstrates a  
19 psychological theory known as 'radical acceptance' (43), and may have been responsible in part for the  
20 resilience reported by many participants, also having been identified as a successful coping strategy for  
21 healthcare workers in previous pandemics (36). Some academics have critiqued 'resilience' as a concept for its  
22 focus on individual- rather than structural-level factors (44), however, participants in the study highlighted the  
23 link between these factors, particularly the importance of social networks and social support structures at  
24 work. Most participants also expressed gratitude for being able to continue working and described a sense of  
25 increased purpose and reward for being able to contribute during the pandemic.  
26  
27  
28  
29  
30  
31

32 Common 'personal growth' themes were frequently described in participant accounts. Most participants  
33 reflected more on 'what matters' in life during this period, which included relationships with friends and  
34 family, their health and the health of loved ones, and 'appreciating the small things' in life. These findings  
35 mirror international qualitative studies looking at the psychological impact of COVID-19 and previous  
36 pandemics on health and care workers which found they experienced 'growth under pressure' (5,33) and  
37 increased gratitude and self-reflection (33). 'Growth under pressure' may be a closely linked (but slightly  
38 diluted) concept to 'post-traumatic growth' seen in individuals experiencing personal growth in the aftermath  
39 of highly challenging life crises (45). Lastly, in relation to one of the key theories which informed our interview  
40 guide, participants demonstrated a high "sense of coherence" which may have enhanced their ability to cope  
41 during stressful experiences (19). Participants spoke about 'manageability' whereby they were highly proactive  
42 in their coping mechanisms, 'comprehensibility' in their enhanced understanding of the virus and need for  
43 social distancing restrictions, and 'meaningfulness' in how they experienced a heightened sense of purpose  
44 through their contribution during the pandemic.  
45  
46  
47  
48  
49  
50  
51  
52  
53

## 54 Strengths & Limitations

- 56 • This is the first known study in the UK to interview both health and social care professionals working  
57 in a range of settings on their experiences working through COVID-19, which we felt important as  
58 they all continued to provide vital frontline care during the pandemic. This study used a strong  
59  
60



1  
2  
3 theoretical approach to inform the topic guide, and one-to-one interviews allowed in-depth analysis  
4 of the psychosocial experiences of health and social care professionals, complementing the wider  
5 breadth of quantitative evidence. There were also some limitations. First, we interviewed a wide  
6 range of professions, which provided breadth of experience but might limit the specificity of findings.  
7 However, due to similarities in the roles of health and care professionals we felt it important to  
8 include a range of voices. Second, given the fluctuating nature of the pandemic, attitudes of health  
9 and social care professionals may change over time. This can be difficult to capture during a single  
10 interview, however we did ask questions on how their experience had progressed longitudinally.  
11 Third, our sample may have been biased towards people who had more free time to participate and  
12 so were coping better than others. However, our sample still described a number of stressful  
13 experiences during the pandemic, and it is equally possible that workers who were frustrated or  
14 stressed wished to express their views. Lastly, interviews were conducted over the phone or video  
15 which may have limited the degree to which participants felt able to express themselves, however it  
16 may also have been that some participants felt more comfortable communicating this way.  
17 Moreover, it was also necessary during the times of the pandemic and also allowed greater uptake,  
18 convenience and good regional spread.  
19  
20  
21  
22  
23  
24  
25  
26  
27  
28  
29  
30

## 31 Implications

32  
33 This study has important implications for health and social care workers, managers, commissioners of services  
34 and policy makers during the ongoing pandemic and beyond. First, it highlights the key stressors experienced  
35 by health and social care professionals during the COVID-19 pandemic. Many of these echo findings from  
36 previous epidemics, but whilst this is reassuring in terms of data credibility, it highlights a concerning lack of  
37 improvement in working conditions during such emergencies over the past two decades. It is vital that the  
38 challenges identified here are addressed. Health and care professionals navigating difficult conversations via  
39 telephone or video may benefit from extra training and support at work, for example in use of the WIRE-  
40 SPIKES protocol for breaking bad news remotely (46). Further, this study provides evidence for the supportive  
41 and coping mechanisms used by workers who experienced resilience during this period. Application of coping  
42 strategies including leisure activities were common and reportedly beneficial, as were the use of mindful  
43 techniques such as expressing gratitude. This suggests that health and care professionals may benefit from  
44 regular work-based interventions providing space for such activities. Whilst such activities may feel extraneous  
45 during emergency situations, the building of resilience and positive coping outside of pandemic situations and  
46 the tackling of problems such as staff burnout will likely improve staff coping capacity in future epidemic  
47 situations. Alongside this, adequate provision for social support should be ensured, from family and friends but  
48 also via the work place e.g. through enhanced supervision or peer support. The research presented here  
49 suggests that investment into wellbeing support could play a vital role in helping health and care workers to  
50 manage emotional stress.  
51  
52  
53  
54  
55  
56  
57  
58  
59  
60

## Conclusion

To the best of our knowledge, this is the first qualitative study to explore the psychosocial impact of the COVID-19 pandemic on both health and social care professionals working in different settings across the UK. Participants experienced communication challenges and changing work conditions, but also positive factors such as increased team unity, and greater reflection on what matters in their life. This study offers important evidence for continued and future disruptions caused by the COVID-19 pandemic. It also elucidates successful psychological and practical strategies deployed by health and social care professionals that could be used to support their resilience and well-being.

## Funding statement

This COVID-19 Social Study was funded by the Nuffield Foundation [WEL/FR-000022583], but the views expressed here are those of the authors. The study was also supported by the MARCH Mental Health Network funded by the Cross-Disciplinary Mental Health Network Plus initiative supported by UK Research and Innovation [ES/S002588/1], and by the Wellcome Trust [221400/Z/20/Z]. DF was funded by the Wellcome Trust [205407/Z/16/Z].

## Ethical approval

The study was reviewed and approved by the UCL Ethics Committee (Project ID 14895/005).

## Acknowledgements

The authors would like to thank other members of the qualitative COVID-19 social study team at UCL, who helped discuss themes during the analysis stages at weekly team meetings: Dr Thomas May, Dr Anna Roberts, and Dr Joanna Dawes.

**Contributors:** DF, AB and HA conceived the study and contributed to the study design. HA conducted all the interviews apart from 1, which AB conducted. HA coded all the transcriptions. AM coded 4 transcripts for cross-checking purposes. HA wrote up the manuscript. All authors (HA, DF, AM, AB) critically reviewed the manuscript and approved the final submission.

**Competing interests:** None declared.

**Data sharing statement:** Raw data is available via participant quotations and the topic interview guide is provided in Supplementary Material.

## References

1. Adhikari SP, Meng S, Wu Y-J, Mao Y-P, Ye R-X, Wang Q-Z, et al. Epidemiology, causes, clinical manifestation and diagnosis, prevention and control of coronavirus disease (COVID-19) during the early outbreak period: a scoping review. *Infect Dis Poverty*. 2020 Mar 17;9(1):29.
2. Iacobucci G. Covid-19: UK lockdown is “crucial” to saving lives, say doctors and scientists. *BMJ* [Internet]. 2020 Mar 24 [cited 2020 Sep 3];368. Available from: <https://www.bmj.com/content/368/bmj.m1204>
3. Shaw SCK. Hopelessness, helplessness and resilience: The importance of safeguarding our trainees’ mental wellbeing during the COVID-19 pandemic. *Nurse Educ Pract*. 2020 Mar;44:102780.
4. McAlonan GM, Lee AM, Cheung V, Cheung C, Tsang KWT, Sham PC, et al. Immediate and sustained psychological impact of an emerging infectious disease outbreak on health care workers. *Can J Psychiatry*. 2007 Apr;52(4):241–7.
5. Kim Y. Nurses’ experiences of care for patients with Middle East respiratory syndrome-coronavirus in South Korea. *American Journal of Infection Control*. 2018 Jul 1;46(7):781–7.
6. Lee S-H, Juang Y-Y, Su Y-J, Lee H-L, Lin Yi-Hui, Chao C-C. Facing SARS: psychological impacts on SARS team nurses and psychiatric services in a Taiwan general hospital. *General Hospital Psychiatry*. 2005 Sep 1;27(5):352–8.
7. Kang L, Li Y, Hu S, Chen M, Yang C, Yang BX, et al. The mental health of medical workers in Wuhan, China dealing with the 2019 novel coronavirus. *The Lancet Psychiatry*. 2020 Mar 1;7(3):e14.
8. Lai J, Ma S, Wang Y, Cai Z, Hu J, Wei N, et al. Factors Associated With Mental Health Outcomes Among Health Care Workers Exposed to Coronavirus Disease 2019. *JAMA Netw Open*. 2020 Mar 23;3(3):e203976.
9. Du J, Dong L, Wang T, Yuan C, Fu R, Zhang L, et al. Psychological symptoms among frontline healthcare workers during COVID-19 outbreak in Wuhan. *Gen Hosp Psychiatry* [Internet]. 2020 Apr 3 [cited 2020 Oct 26]; Available from: <https://www.ncbi.nlm.nih.gov/pmc/articles/PMC7194721/>
10. Sun N, Wei L, Shi S, Jiao D, Song R, Ma L, et al. A qualitative study on the psychological experience of caregivers of COVID-19 patients. *American Journal of Infection Control*. 2020 Jun 1;48(6):592–8.
11. Xiao H, Zhang Y, Kong D, Li S, Yang N. The Effects of Social Support on Sleep Quality of Medical Staff Treating Patients with Coronavirus Disease 2019 (COVID-19) in January and February 2020 in China. *Med Sci Monit*. 2020 Mar 5;26:e923549-1-e923549-8.
12. Lu W, Wang H, Lin Y, Li L. Psychological status of medical workforce during the COVID-19 pandemic: A cross-sectional study. *Psychiatry Res*. 2020 Jun;288:112936.
13. Huang Y, Zhao N. Generalized anxiety disorder, depressive symptoms and sleep quality during COVID-19 outbreak in China: a web-based cross-sectional survey. *Psychiatry Res*. 2020 Jun;288:112954.

14. Quick TL. Linking productivity and health. *Healthy Work: Stress, Productivity, and the Reconstruction of Working Life* Robert Karasek and Tores Theorell New York: Basic Books, Inc. 1990 \$29.95 Canada \$39.95 381 pages. *National Productivity Review*. 1990;9(4):475–8.
15. Imo UO. Burnout and psychiatric morbidity among doctors in the UK: A systematic literature review of prevalence and associated factors. *BJPsych Bulletin*. 2017 Aug;41(4):197–204.
16. Coyle D, Edwards D, Hannigan B, Fothergill A, Burnard P. A systematic review of stress among mental health social workers. *International Social Work*. 2005 Mar 1;48(2):201–11.
17. Vindrola-Padros C, Andrews L, Dowrick A, Djellouli N, Fillmore H, Gonzalez EB, et al. Perceptions and experiences of healthcare workers during the COVID-19 pandemic in the UK. *BMJ Open*. 2020 Nov 1;10(11):e040503.
18. Williamson V, Murphy D, Greenberg N. COVID-19 and experiences of moral injury in front-line key workers. *Occup Med (Lond)*. 2020 Jul 17;70(5):317–9.
19. Eriksson M. The Sense of Coherence in the Salutogenic Model of Health. In: Mittelmark MB, Sagy S, Eriksson M, Bauer GF, Pelikan JM, Lindström B, et al., editors. *The Handbook of Salutogenesis* [Internet]. Cham (CH): Springer; 2017 [cited 2019 Nov 27]. Available from: <http://www.ncbi.nlm.nih.gov/books/NBK435812/>
20. Eriksson M, Lindstrom B. Antonovsky's sense of coherence scale and its relation with quality of life: a systematic review. *Journal of Epidemiology & Community Health*. 2007 Nov 1;61(11):938–44.
21. Labrague LJ. Psychological resilience, coping behaviours, and social support among healthcare workers during the COVID-19 pandemic: a systematic review of quantitative studies. *medRxiv*. 2020 Nov 6;2020.11.05.20226415.
22. Nyashanu M, Pfende F, Ekpenyong M. Exploring the challenges faced by frontline workers in health and social care amid the COVID-19 pandemic: experiences of frontline workers in the English Midlands region, UK. *Journal of Interprofessional Care*. 2020 Sep 2;34(5):655–61.
23. Bu F, Steptoe A, Mak HW, Fancourt D. Time-use and mental health during the COVID-19 pandemic: a panel analysis of 55,204 adults followed across 11 weeks of lockdown in the UK. *medRxiv*. 2020 Aug 21;2020.08.18.20177345.
24. Tong A, Sainsbury P, Craig J. Consolidated criteria for reporting qualitative research (COREQ): a 32-item checklist for interviews and focus groups. *Int J Qual Health Care*. 2007 Dec 1;19(6):349–57.
25. Berkman LF. The Assessment of Social Networks and Social Support in the Elderly. *Journal of the American Geriatrics Society*. 1983;31(12):743–9.
26. Braun V, Clarke V. Reflecting on reflexive thematic analysis. *Qualitative Research in Sport, Exercise and Health*. 2019 Aug 8;11(4):589–97.
27. Braun V, Clarke V. Using thematic analysis in psychology. *Qualitative Research in Psychology*. 2006 Jan;3(2):77–101.
28. QSR International Pty Ltd. NVIVO [Internet]. [cited 2020 Nov 4]. Available from: <https://www.qsrinternational.com/nvivo-qualitative-data-analysis-software/home>
29. Donaghy E, Atherton H, Hammersley V, McNeilly H, Bikker A, Robbins L, et al. Acceptability, benefits, and challenges of video consulting: a qualitative study in primary care. *Br J Gen Pract*. 2019 Sep 1;69(686):e586–94.

- 1
  - 2
  - 3
  - 4
  - 5
  - 6
  - 7
  - 8
  - 9
  - 10
  - 11
  - 12
  - 13
  - 14
  - 15
  - 16
  - 17
  - 18
  - 19
  - 20
  - 21
  - 22
  - 23
  - 24
  - 25
  - 26
  - 27
  - 28
  - 29
  - 30
  - 31
  - 32
  - 33
  - 34
  - 35
  - 36
  - 37
  - 38
  - 39
  - 40
  - 41
  - 42
  - 43
  - 44
  - 45
  - 46
  - 47
  - 48
  - 49
  - 50
  - 51
  - 52
  - 53
  - 54
  - 55
  - 56
  - 57
  - 58
  - 59
  - 60
30. Monden KR, Gentry L, Cox TR. Delivering Bad News to Patients. *Baylor University Medical Center Proceedings*. 2016 Jan 1;29(1):101–2.
31. Ptacek JT, Fries EA, Eberhardt TL, Ptacek JJ. Breaking bad news to patients: physicians' perceptions of the process. *Support Care Cancer*. 1999 Apr 1;7(3):113–20.
32. Tennen H, Affleck G. Blaming others for threatening events. *Psychological Bulletin*. 1990;108(2):209–32.
33. Sun N, Wei L, Shi S, Jiao D, Song R, Ma L, et al. A qualitative study on the psychological experience of caregivers of COVID-19 patients. *American Journal of Infection Control*. 2020 Jun 1;48(6):592–8.
34. Balasubramanian A, Paleri V, Bennett R, Paleri V. Impact of COVID-19 on the mental health of surgeons and coping strategies. *Head & Neck*. 2020;42(7):1638–44.
35. Berkman LF. *Social Networks and Health*. 2010;27.
36. Wong TW, Yau JKY, Chan CLW, Kwong RSY, Ho SMY, Lau CC, et al. The psychological impact of severe acute respiratory syndrome outbreak on healthcare workers in emergency departments and how they cope. *European Journal of Emergency Medicine*. 2005 Feb;12(1):13–18.
37. Stathopoulou G, Powers MB, Berry AC, Smits JAJ, Otto MW. Exercise Interventions for Mental Health: A Quantitative and Qualitative Review. *Clinical Psychology: Science and Practice*. 2006;13(2):179–93.
38. Fancourt D, Finn S. What is the evidence on the role of the arts in improving health and well-being? A scoping review [Internet]. WHO Regional Office for Europe, Copenhagen; 2019. (WHO Health Evidence Network Synthesis Reports). Available from: <http://europepmc.org/books/NBK553773>
39. Clatworthy J, Hinds J, Camic PM. Gardening as a mental health intervention: a review. *Mental Health Review Journal* [Internet]. 2013 Nov 29 [cited 2020 Oct 30]; Available from: <https://www.emerald.com/insight/content/doi/10.1108/MHRJ-02-2013-0007/full/html>
40. Kotera Y, Richardson M, Sheffield D. Effects of Shinrin-Yoku (Forest Bathing) and Nature Therapy on Mental Health: a Systematic Review and Meta-analysis. *Int J Ment Health Addiction* [Internet]. 2020 Jul 28 [cited 2020 Oct 30]; Available from: <https://doi.org/10.1007/s11469-020-00363-4>
41. Lyall LM, Wyse CA, Graham N, Ferguson A, Lyall DM, Cullen B, et al. Association of disrupted circadian rhythmicity with mood disorders, subjective wellbeing, and cognitive function: a cross-sectional study of 91 105 participants from the UK Biobank. *The Lancet Psychiatry*. 2018 Jun 1;5(6):507–14.
42. Lanza HI, Drabick DAG. Family Routine Moderates the Relation Between Child Impulsivity and Oppositional Defiant Disorder Symptoms. *J Abnorm Child Psychol*. 2011 Jan 1;39(1):83–94.
43. Robins CJ, Schmidt III H, Linehan MM. Dialectical Behavior Therapy: Synthesizing Radical Acceptance with Skillful Means. In: *Mindfulness and acceptance: Expanding the cognitive-behavioral tradition*. New York, NY, US: Guilford Press; 2004. p. 30–44.
44. Fletcher D, Sarkar M. Psychological resilience: A review and critique of definitions, concepts, and theory. *European Psychologist*. 2013;18(1):12–23.
45. Tedeschi RG, Calhoun LG. Posttraumatic Growth: Conceptual Foundations and Empirical Evidence. *Psychological Inquiry*. 2004 Jan 1;15(1):1–18.
46. Holstead RG, Robinson AG. Discussing Serious News Remotely: Navigating Difficult Conversations During a Pandemic. *JCO Oncology Practice*. 2020 May 18;16(7):363–8.

1  
2  
3  
4  
5  
6  
7  
8  
9  
10  
11  
12  
13  
14  
15  
16  
17  
18  
19  
20  
21  
22  
23  
24  
25  
26  
27  
28  
29  
30  
31  
32  
33  
34  
35  
36  
37  
38  
39  
40  
41  
42  
43  
44  
45  
46  
47  
48  
49  
50  
51  
52  
53  
54  
55  
56  
57  
58  
59  
60

For peer review only

- How would you describe your social life now that social distancing measures have been brought in because of Covid-19?
- In what ways has your work life been impacted by the Covid-19 pandemic?
- How do you feel about the changes that have been brought about by Covid-19? Have they had any impact on your mental health or wellbeing?
- Have there been any positive experiences for you resulting from the Covid-19 pandemic?

Figure 1: Examples of Questions in the Topic Guide

|                                 |                          |                                                                                                                                                                          |
|---------------------------------|--------------------------|--------------------------------------------------------------------------------------------------------------------------------------------------------------------------|
| 1<br>2<br>3<br>4<br>5<br>6<br>7 | Communication challenges | <ul style="list-style-type: none"><li>•Virtual consulting</li><li>•Difficult conversations</li></ul>                                                                     |
| 8<br>9<br>10<br>11<br>12        | Work-related stressors   | <ul style="list-style-type: none"><li>•Need to protect loved ones</li><li>•Public not following rules</li><li>•Increased workload and changing work conditions</li></ul> |
| 13<br>14<br>15<br>16<br>17      | Support structures       | <ul style="list-style-type: none"><li>•Team unity</li><li>•Leadership</li><li>•Social support</li></ul>                                                                  |
| 18<br>19<br>20<br>21<br>22      | Resilience               | <ul style="list-style-type: none"><li>•Proactive coping</li><li>•Accepting uncertainty</li><li>•Increased sense of purpose and reward</li></ul>                          |
| 23<br>24<br>25<br>26<br>27      | Personal growth          | <ul style="list-style-type: none"><li>•Slowing down</li><li>•Increased reflection</li><li>•Improved non-work relationships</li></ul>                                     |

Figure 2: Themes and sub-themes



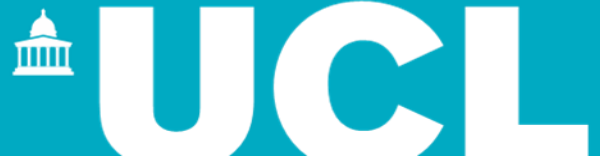

## Draft topic guide: Health and Care Workers

### Ask to describe 'normal life' – before the crisis, and now

- Employed? Type of job, hours etc,
- Full time parent or carer?
- Who you normally live with, does this change, separated/ extended family?
- Whether you would usually have done any type(s) of regular exercise (whatever they perceive as exercise including walking/gardening)

## SOCIAL LIFE

### What was your social life before the Covid-19 pandemic? Has this changed? If so, what has been the impact of Covid-19 on your social life?

- How would you describe your social network before Covid – for example size, types of people, types of relationships, do they live with you, nearby or further away, how often do you see each other, how well do you know each other? How do you interact, face to face, online or social media? Describe some of your common socialising activities. **Has this changed? What has the impact of Covid been on your social network?**
- Can you tell us about any ways your social networks/ friendship groups influence you, such as peer pressure, or encouraging you to get involved in things? Do you compare your life to theirs?
- Could you describe any community participation or volunteering participation before Covid? **Has this changed? If so, what has been the impact of Covid-19 on community participation/volunteering participation?**
- Could you describe the social support you have before Covid? (such as emotional support, advice and information, someone to help you with money or milk/bread/essentials) **Has this changed? If so, what has been the impact of Covid-19 on your social support?**
- **Social engagement (social roles, bonding, attachment) (pre- and post- Covid)**

## WORK LIFE

### How would you describe your work life before the Covid-19 pandemic?

Prompts include:

- Describe a typical day?
- Describe your work environment prior to the crisis
- How much autonomy did you have in your role?
- Did you find your job rewarding?
- Did you feel able to do your job to a high standard?
- Did you enjoy your job?
- Describe your sense, if any, of team unity or disunity prior to this crisis?
- How able were you to follow organisational rules and how did you feel about this?
- Normally did you feel safe at work? In what way?

### How would you describe your work life since the Covid-19 pandemic? Please tell us about this

- Describe a typical day now – how have common work practices changed? Have you adapted your work in response to Covid-19 (e.g. delivery, operating hours, change of products/production methods)
- Describe your overall work environment now
- How much autonomy do you feel you have at the moment and how has this changed?
- Are you finding work rewarding at the moment?
- Do you feel able to do your job to a high standard – has this changed since the crisis?
- Enjoyment – do you currently enjoy your job?
- Describe your sense, if any, of team unity or disunity during this crisis?
- How able are you to follow organisational rules and how do you feel about this?
- Do you feel safe? If this has changed, how?

## MENTAL HEALTH

### How do you feel about the changes that have been brought about by Covid-19?

#### Have they had any impact on your mental health or wellbeing? Please tell us about these

- What are the things most bothering you at the moment (work or outside of work)?
- What have been the major triggers/causes of any mental health or wellbeing issues?
- How have government guidelines or organisational guidelines impacted your mental health or wellbeing?
- Have you experienced any impact on positive emotions? (prompts: how deeply you can engage with what you are doing, sense of meaning/ purpose, relationships with others, how well you are managing and feelings of control over your situation?)
- Has there been any impact on your sense of identity?
- Have you experienced any negative psychological feelings? (prompts: such as shame, guilt, lack of pleasure, anxiety, worry)
- Please tell us about any physical symptoms due to being stressed or anxious? (prompts: fatigue, sleep problems, pain, illness symptoms, palpitations)

#### Have you been doing/ planning anything to help with this?

- How has your support been, from friends/family? From work colleagues/your organisation?
- Connecting with family or friends online
- Online groups?
- Hobbies/ Reading
- Exercise at home <ask about what they have been doing and if there are specific resources they have found useful to exercise>
- Volunteering
- Other engagement

#### Why are you doing/ not doing these things?

- Helpful/ not helpful – please tell us why
- Enjoyable
- Good for mental health/ wellbeing
- Can't get online, not connected, not comfortable, affordability, confidence in using/ skills
- Skills in using the internet/ communication software
- Living arrangements/ Work/ caring demands
- Peer support/ pressure
- Difficulties/ restriction in physical environment

## PROSPECTION

1  
2  
3 **Has the pandemic meant that you have any worries for the future?**  
4

- 5
- 6 • Worries about work/the future of your work?
  - 7 • Worries for yourself? Anything not directly connected to work?

8 **How are these different from the worries you had before?**  
9

- 10
- 11 • Sense of control/ powerlessness
  - 12 • Severity of worries / perspective

13 **Will this change the way you live your life in future?**

- 14
- 15 • The way you connect with others
  - 16 • How you look after yourself
  - 17 • How you support others
  - 18 • How you exercise?

19 Do you think there will be any changes to the way you work in the future? Why/why not?

20  
21 Has this changed any of your priorities for the future?  
22  
23  
24  
25  
26  
27  
28  
29  
30  
31  
32  
33  
34  
35  
36  
37  
38  
39  
40  
41  
42  
43  
44  
45  
46  
47  
48  
49  
50  
51  
52  
53  
54  
55  
56  
57  
58  
59  
60

## COREQ (CONsolidated criteria for REporting Qualitative research) Checklist

A checklist of items that should be included in reports of qualitative research. You must report the page number in your manuscript where you consider each of the items listed in this checklist. If you have not included this information, either revise your manuscript accordingly before submitting or note N/A.

| Topic                                          | Item No. | Guide Questions/Description                                                                                                                              | Reported on Page No. |
|------------------------------------------------|----------|----------------------------------------------------------------------------------------------------------------------------------------------------------|----------------------|
| <b>Domain 1: Research team and reflexivity</b> |          |                                                                                                                                                          |                      |
| <i>Personal characteristics</i>                |          |                                                                                                                                                          |                      |
| Interviewer/facilitator                        | 1        | Which author/s conducted the interview or focus group?                                                                                                   |                      |
| Credentials                                    | 2        | What were the researcher's credentials? E.g. PhD, MD                                                                                                     |                      |
| Occupation                                     | 3        | What was their occupation at the time of the study?                                                                                                      |                      |
| Gender                                         | 4        | Was the researcher male or female?                                                                                                                       |                      |
| Experience and training                        | 5        | What experience or training did the researcher have?                                                                                                     |                      |
| <i>Relationship with participants</i>          |          |                                                                                                                                                          |                      |
| Relationship established                       | 6        | Was a relationship established prior to study commencement?                                                                                              |                      |
| Participant knowledge of the interviewer       | 7        | What did the participants know about the researcher? e.g. personal goals, reasons for doing the research                                                 |                      |
| Interviewer characteristics                    | 8        | What characteristics were reported about the interviewer/facilitator? e.g. Bias, assumptions, reasons and interests in the research topic                |                      |
| <b>Domain 2: Study design</b>                  |          |                                                                                                                                                          |                      |
| <i>Theoretical framework</i>                   |          |                                                                                                                                                          |                      |
| Methodological orientation and Theory          | 9        | What methodological orientation was stated to underpin the study? e.g. grounded theory, discourse analysis, ethnography, phenomenology, content analysis |                      |
| <i>Participant selection</i>                   |          |                                                                                                                                                          |                      |
| Sampling                                       | 10       | How were participants selected? e.g. purposive, convenience, consecutive, snowball                                                                       |                      |
| Method of approach                             | 11       | How were participants approached? e.g. face-to-face, telephone, mail, email                                                                              |                      |
| Sample size                                    | 12       | How many participants were in the study?                                                                                                                 |                      |
| Non-participation                              | 13       | How many people refused to participate or dropped out? Reasons?                                                                                          |                      |
| <i>Setting</i>                                 |          |                                                                                                                                                          |                      |
| Setting of data collection                     | 14       | Where was the data collected? e.g. home, clinic, workplace                                                                                               |                      |
| Presence of non-participants                   | 15       | Was anyone else present besides the participants and researchers?                                                                                        |                      |
| Description of sample                          | 16       | What are the important characteristics of the sample? e.g. demographic data, date                                                                        |                      |
| <i>Data collection</i>                         |          |                                                                                                                                                          |                      |
| Interview guide                                | 17       | Were questions, prompts, guides provided by the authors? Was it pilot tested?                                                                            |                      |
| Repeat interviews                              | 18       | Were repeat interviews carried out? If yes, how many?                                                                                                    |                      |
| Audio/visual recording                         | 19       | Did the research use audio or visual recording to collect the data?                                                                                      |                      |
| Field notes                                    | 20       | Were field notes made during and/or after the interview or focus group?                                                                                  |                      |
| Duration                                       | 21       | What was the duration of the interviews or focus group?                                                                                                  |                      |
| Data saturation                                | 22       | Was data saturation discussed?                                                                                                                           |                      |
| Transcripts returned                           | 23       | Were transcripts returned to participants for comment and/or                                                                                             |                      |

| Topic                                  | Item No. | Guide Questions/Description                                                                                                        | Reported on Page No. |
|----------------------------------------|----------|------------------------------------------------------------------------------------------------------------------------------------|----------------------|
|                                        |          | correction?                                                                                                                        |                      |
| <b>Domain 3: analysis and findings</b> |          |                                                                                                                                    |                      |
| <i>Data analysis</i>                   |          |                                                                                                                                    |                      |
| Number of data coders                  | 24       | How many data coders coded the data?                                                                                               |                      |
| Description of the coding tree         | 25       | Did authors provide a description of the coding tree?                                                                              |                      |
| Derivation of themes                   | 26       | Were themes identified in advance or derived from the data?                                                                        |                      |
| Software                               | 27       | What software, if applicable, was used to manage the data?                                                                         |                      |
| Participant checking                   | 28       | Did participants provide feedback on the findings?                                                                                 |                      |
| <i>Reporting</i>                       |          |                                                                                                                                    |                      |
| Quotations presented                   | 29       | Were participant quotations presented to illustrate the themes/findings?<br>Was each quotation identified? e.g. participant number |                      |
| Data and findings consistent           | 30       | Was there consistency between the data presented and the findings?                                                                 |                      |
| Clarity of major themes                | 31       | Were major themes clearly presented in the findings?                                                                               |                      |
| Clarity of minor themes                | 32       | Is there a description of diverse cases or discussion of minor themes?                                                             |                      |

Developed from: Tong A, Sainsbury P, Craig J. Consolidated criteria for reporting qualitative research (COREQ): a 32-item checklist for interviews and focus groups. *International Journal for Quality in Health Care*. 2007. Volume 19, Number 6: pp. 349 – 357

**Once you have completed this checklist, please save a copy and upload it as part of your submission. DO NOT include this checklist as part of the main manuscript document. It must be uploaded as a separate file.**
